# Supplementary material for: Unraveling temporal and spatial biomarkers of epithelial-mesenchymal transition in colorectal cancer: insights into the crucial role of immunosuppressive cells
Source: Springer Nature journal article supplement (doi:10.1186/s12967-023-04600-x), 2023-11-08

**a** Two CRC samples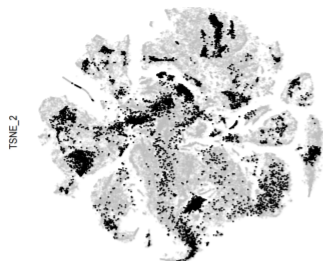

E-MTAB-8107

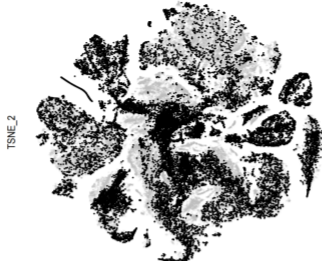

GSE132465

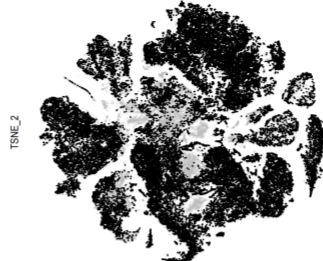

GSE144735

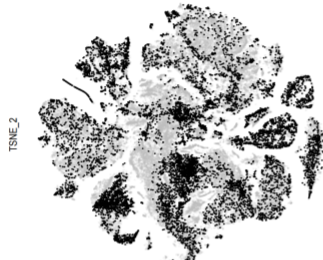

GSE132257

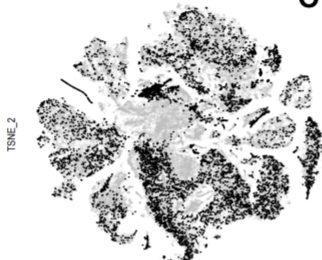**b** Samples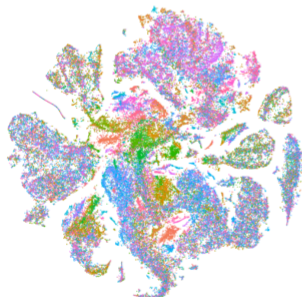

Samples

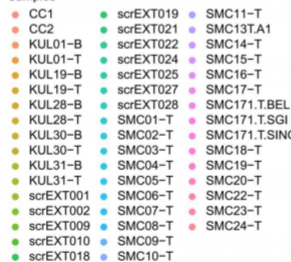

Patients

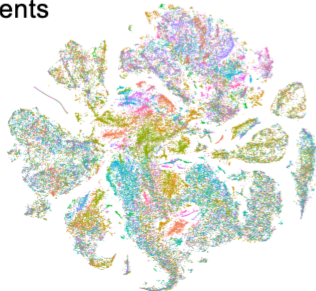

Patients

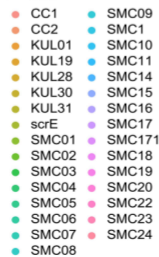**c**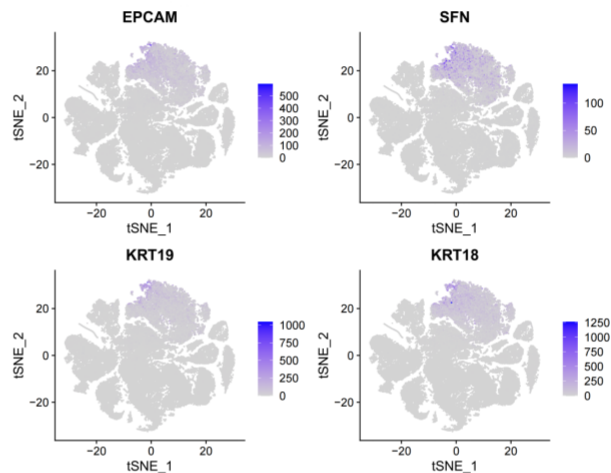**d**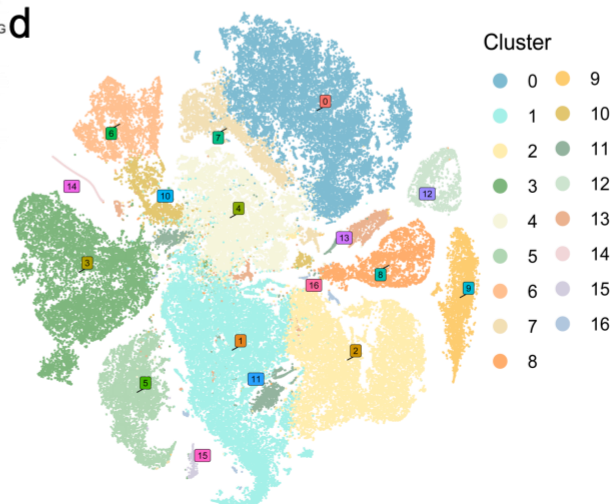

Cluster

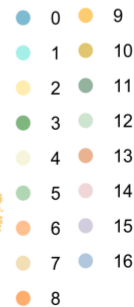

Supplement: MOESM1 [file 26279346]
