# Supplementary material for: Unraveling temporal and spatial biomarkers of epithelial-mesenchymal transition in colorectal cancer: insights into the crucial role of immunosuppressive cells
Source: Springer Nature journal article supplement (doi:10.1186/s12967-023-04600-x), 2023-11-08

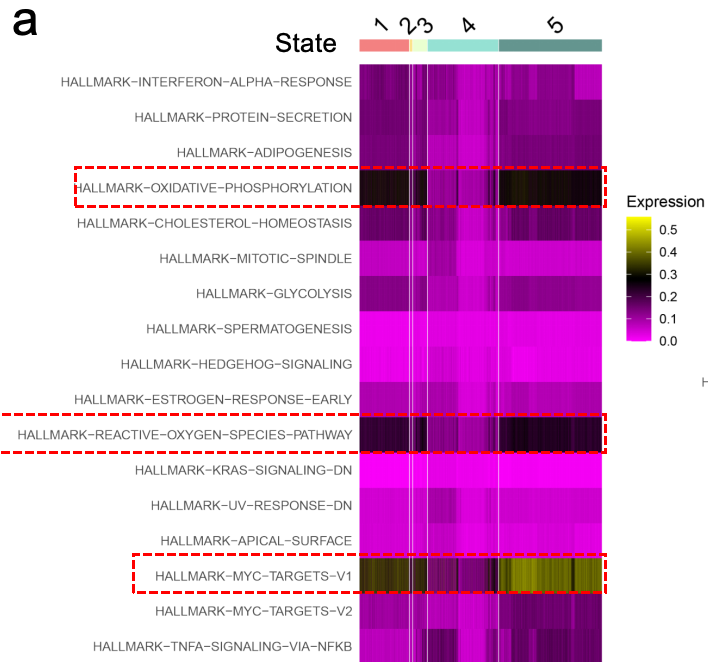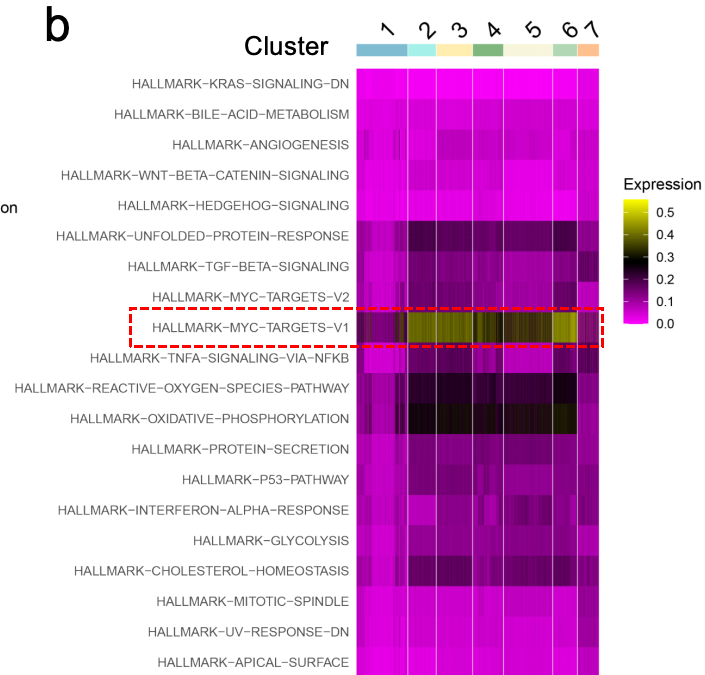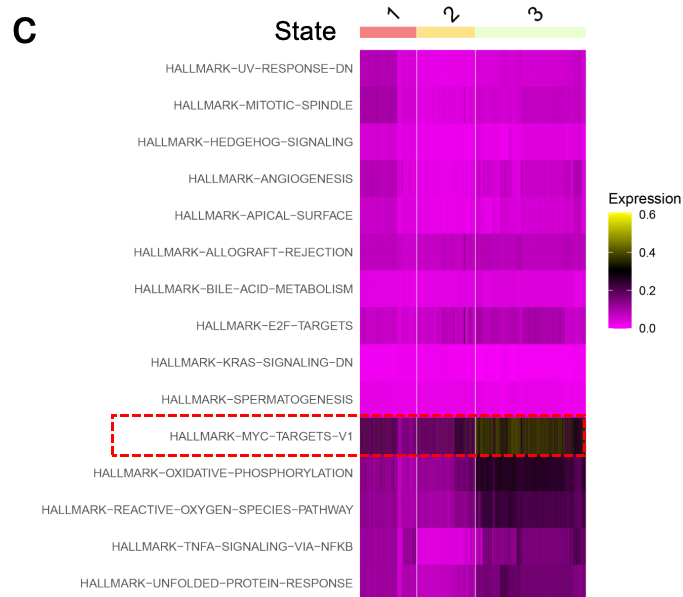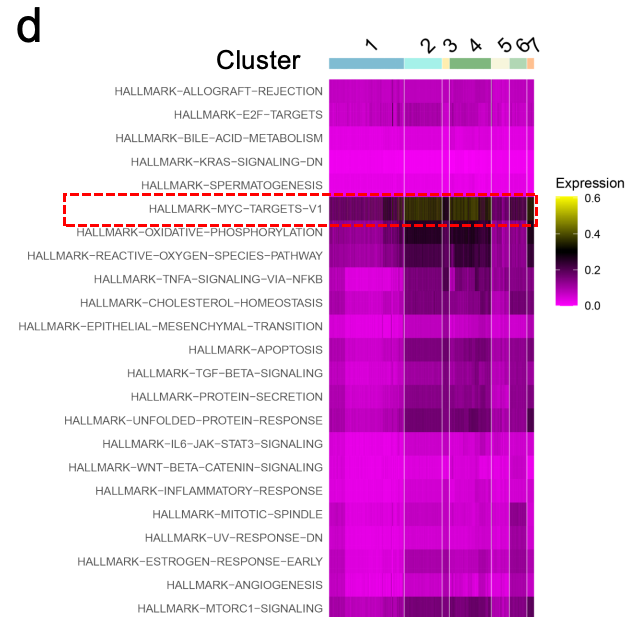

Supplement: MOESM4 [file 26279346]
