# Supplementary material for: Unraveling temporal and spatial biomarkers of epithelial-mesenchymal transition in colorectal cancer: insights into the crucial role of immunosuppressive cells
Source: J Transl Med. 2023 Nov 8;21:794. doi: 10.1186/s12967-023-04600-x (PMC10633927; doi:10.1186/s12967-023-04600-x)
Supplement: Supplementary file 13 — Additional file 13: Stage III Differential Genes. [file 12967_2023_4600_MOESM13_ESM.xlsx]

## Sheet: TableS12
Table S11: Stage I/II Differential Genes
	status	family	pval	qval	gene_short_name	num_cells_expressed	use_for_ordering
JUNB	OK	negbinomial.size	0	0	JUNB	8920	TRUE
NFKBIA	OK	negbinomial.size	0	0	NFKBIA	7802	TRUE
TNFAIP3	OK	negbinomial.size	0	0	TNFAIP3	4369	TRUE
PTGS2	OK	negbinomial.size	1.55648e-07	2.46786e-07	PTGS2	286	FALSE
CXCL1	OK	negbinomial.size	0	0	CXCL1	6302	TRUE
CCL20	OK	negbinomial.size	0	0	CCL20	6562	TRUE
HBEGF	OK	negbinomial.size	3.01136e-145	2.13062e-144	HBEGF	5180	TRUE
KLF6	OK	negbinomial.size	0	0	KLF6	8788	TRUE
PLAUR	OK	negbinomial.size	4.35955e-62	1.91239e-61	PLAUR	6624	TRUE
ZFP36	OK	negbinomial.size	0	0	ZFP36	8389	TRUE
JUN	OK	negbinomial.size	0	0	JUN	9210	TRUE
IL1B	OK	negbinomial.size	2.37147e-09	4.04256e-09	IL1B	927	FALSE
SOD2	OK	negbinomial.size	2.51267e-220	2.50506e-219	SOD2	8158	TRUE
ETS2	OK	negbinomial.size	8.34129e-111	4.85714e-110	ETS2	7384	FALSE
F3	OK	negbinomial.size	2.99161e-16	6.30923e-16	F3	2486	FALSE
SDC4	OK	negbinomial.size	5.80594e-154	4.29248e-153	SDC4	7514	TRUE
EGR1	OK	negbinomial.size	0	0	EGR1	5984	TRUE
IL6	OK	negbinomial.size	0.729977	0.749337	IL6	205	FALSE
TNF	OK	negbinomial.size	1.34563e-47	4.97431e-47	TNF	575	FALSE
KDM6B	OK	negbinomial.size	1.10311e-19	2.56482e-19	KDM6B	3394	FALSE
NFKB1	OK	negbinomial.size	1.27663e-166	1.01208e-165	NFKB1	3545	FALSE
LIF	OK	negbinomial.size	0.785686	0.801521	LIF	2523	FALSE
PTX3	OK	negbinomial.size	0.0309612	0.0366411	PTX3	11	FALSE
FOSL1	OK	negbinomial.size	6.75363350784705e-316	8.88778169514096e-315	FOSL1	3820	TRUE
NR4A1	OK	negbinomial.size	0	0	NR4A1	6757	TRUE
JAG1	OK	negbinomial.size	7.8801e-104	4.43171e-103	JAG1	3680	FALSE
CCL2	OK	negbinomial.size	7.81272e-12	1.46045e-11	CCL2	671	FALSE
EHD1	OK	negbinomial.size	0.13497	0.149512	EHD1	3989	FALSE
PHLDA1	OK	negbinomial.size	2.66226e-65	1.2165e-64	PHLDA1	6267	TRUE
GEM	OK	negbinomial.size	3.61624e-65	1.62979e-64	GEM	1857	FALSE
GADD45A	OK	negbinomial.size	2.49972e-33	7.51058e-33	GADD45A	6312	TRUE
BHLHE40	OK	negbinomial.size	0.000805306	0.00106191	BHLHE40	5257	FALSE
SOCS3	OK	negbinomial.size	4.18909e-26	1.1205e-25	SOCS3	1964	FALSE
NFIL3	OK	negbinomial.size	9.99918e-12	1.84816e-11	NFIL3	1468	FALSE
SERPINE1	OK	negbinomial.size	6.03761e-33	1.79762e-32	SERPINE1	635	FALSE
RELA	OK	negbinomial.size	0.00721806	0.00897824	RELA	3761	FALSE
BIRC2	OK	negbinomial.size	2.66584e-17	5.82766e-17	BIRC2	3718	FALSE
CXCL6	OK	negbinomial.size	0.0221776	0.026678	CXCL6	68	FALSE
CD44	OK	negbinomial.size	7.87087e-24	1.9843e-23	CD44	6883	FALSE
INHBA	OK	negbinomial.size	1.70081e-19	3.92679e-19	INHBA	189	FALSE
MYC	OK	negbinomial.size	1.2203e-263	1.38441e-262	MYC	6699	TRUE
NAMPT	OK	negbinomial.size	1.87259e-121	1.17349e-120	NAMPT	7263	FALSE
ID2	OK	negbinomial.size	3.94639e-279	4.9937e-278	ID2	7588	TRUE
PHLDA2	OK	negbinomial.size	3.56403e-21	8.40548e-21	PHLDA2	8853	TRUE
CCL5	OK	negbinomial.size	3.35755e-53	1.30726e-52	CCL5	755	FALSE
SQSTM1	OK	negbinomial.size	1.17357e-45	4.2197e-45	SQSTM1	9458	TRUE
GADD45B	OK	negbinomial.size	0	0	GADD45B	5126	TRUE
MCL1	OK	negbinomial.size	4.41901e-171	3.63463e-170	MCL1	8184	TRUE
VEGFA	OK	negbinomial.size	7.1787e-86	3.6903e-85	VEGFA	5720	FALSE
CDKN1A	OK	negbinomial.size	1.00979e-53	3.9787e-53	CDKN1A	5652	FALSE
CCN1	OK	negbinomial.size	1.95679e-182	1.67217e-181	CCN1	302	FALSE
IL18	OK	negbinomial.size	1.60406e-26	4.3257e-26	IL18	4543	FALSE
RHOB	OK	negbinomial.size	1.331e-201	1.21639e-200	RHOB	8118	TRUE
AREG	OK	negbinomial.size	0	0	AREG	7529	TRUE
KLF4	OK	negbinomial.size	1.02612e-142	7.10725e-142	KLF4	6971	TRUE
SAT1	OK	negbinomial.size	2.05111e-82	1.02245e-81	SAT1	10367	TRUE
PMEPA1	OK	negbinomial.size	4.85263e-237	5.0683e-236	PMEPA1	5271	TRUE
CEBPB	OK	negbinomial.size	6.45749e-205	6.07004e-204	CEBPB	6976	TRUE
CSF2	OK	negbinomial.size	0.0193029	0.023391	CSF2	69	FALSE
STAT5A	OK	negbinomial.size	1.63453e-14	3.28905e-14	STAT5A	859	FALSE
CCND1	OK	negbinomial.size	4.73469e-07	7.3132e-07	CCND1	7403	FALSE
SPHK1	OK	negbinomial.size	0.459017	0.480945	SPHK1	423	FALSE
FUT4	OK	negbinomial.size	5.40252e-15	1.11437e-14	FUT4	3225	FALSE
HES1	OK	negbinomial.size	0	0	HES1	6006	TRUE
BCL6	OK	negbinomial.size	9.77549e-16	2.02911e-15	BCL6	648	FALSE
IRS2	OK	negbinomial.size	3.32372e-24	8.44405e-24	IRS2	5257	FALSE
IL23A	OK	negbinomial.size	0.3681	0.390661	IL23A	790	FALSE
SMAD3	OK	negbinomial.size	2.65353e-41	9.00012e-41	SMAD3	3062	FALSE
EDN1	OK	negbinomial.size	0	0	EDN1	4383	TRUE
BMP2	OK	negbinomial.size	2.24471e-08	3.67418e-08	BMP2	1704	FALSE
TNC	OK	negbinomial.size	3.57205e-32	1.03088e-31	TNC	251	FALSE
ENO2	OK	negbinomial.size	2.07041e-10	3.68198e-10	ENO2	1015	FALSE
NDRG1	OK	negbinomial.size	1.0649e-08	1.77844e-08	NDRG1	5308	FALSE
HK2	OK	negbinomial.size	5.77336e-30	1.63042e-29	HK2	3124	FALSE
GPI	OK	negbinomial.size	3.08162e-32	8.93263e-32	GPI	6909	FALSE
SLC2A1	OK	negbinomial.size	1.65714e-112	9.82342e-112	SLC2A1	5809	FALSE
ADM	OK	negbinomial.size	0.00493715	0.00627152	ADM	4475	FALSE
ENO1	OK	negbinomial.size	0	0	ENO1	9392	TRUE
KDM3A	OK	negbinomial.size	4.30245e-11	7.86391e-11	KDM3A	2252	FALSE
CCNG2	OK	negbinomial.size	0.913666	0.920662	CCNG2	1854	FALSE
GAPDH	OK	negbinomial.size	0	0	GAPDH	10935	TRUE
ANGPTL4	OK	negbinomial.size	5.90134e-73	2.77363e-72	ANGPTL4	792	FALSE
LOX	OK	negbinomial.size	1.92692e-06	2.88819e-06	LOX	94	FALSE
IGFBP3	OK	negbinomial.size	2.18714e-06	3.26335e-06	IGFBP3	1031	FALSE
ALDOB	OK	negbinomial.size	4.96543e-67	2.28479e-66	ALDOB	1268	FALSE
STC2	OK	negbinomial.size	6.60497e-43	2.31174e-42	STC2	845	FALSE
ERRFI1	OK	negbinomial.size	4.94065645841247e-324	6.91691904177745e-323	ERRFI1	5766	TRUE
HMOX1	OK	negbinomial.size	0.0258362	0.0307975	HMOX1	1028	FALSE
PGF	OK	negbinomial.size	1.54181e-10	2.77189e-10	PGF	1299	FALSE
CAV1	OK	negbinomial.size	8.74879e-05	0.000121964	CAV1	456	FALSE
GPC3	OK	negbinomial.size	0.0985684	0.111824	GPC3	322	FALSE
S100A4	OK	negbinomial.size	2.82669e-21	6.6905e-21	S100A4	6218	TRUE
EGFR	OK	negbinomial.size	3.07107e-32	8.93263e-32	EGFR	2419	FALSE
CAVIN1	OK	negbinomial.size	1.72443e-15	3.56816e-15	CAVIN1	100	FALSE
BGN	OK	negbinomial.size	6.48223e-51	2.45132e-50	BGN	673	FALSE
CDKN1B	OK	negbinomial.size	1.35099e-17	2.97308e-17	CDKN1B	3557	FALSE
ANXA2	OK	negbinomial.size	0	0	ANXA2	10144	TRUE
PRKCA	OK	negbinomial.size	1.37463e-269	1.64456e-268	PRKCA	3110	TRUE
CXCR4	OK	negbinomial.size	6.63669e-46	2.39942e-45	CXCR4	1598	FALSE
CCN2	OK	negbinomial.size	0	0	CCN2	500	TRUE
PPARGC1A	OK	negbinomial.size	0.00491284	0.00625271	PPARGC1A	1132	FALSE
BCL2	OK	negbinomial.size	9.98965e-59	4.10824e-58	BCL2	508	FALSE
SDC2	OK	negbinomial.size	7.14189e-06	1.05131e-05	SDC2	211	FALSE
VHL	OK	negbinomial.size	4.36357e-05	6.17469e-05	VHL	2099	FALSE
FOXO3	OK	negbinomial.size	9.98834e-235	1.02693e-233	FOXO3	4890	FALSE
PDGFB	OK	negbinomial.size	0.918512	0.92413	PDGFB	221	FALSE
GLRX	OK	negbinomial.size	0	0	GLRX	6515	TRUE
TGFBI	OK	negbinomial.size	5.60241e-71	2.61446e-70	TGFBI	5732	TRUE
DCN	OK	negbinomial.size	1.00238e-21	2.39842e-21	DCN	1015	FALSE
SIAH2	OK	negbinomial.size	4.58328e-16	9.60445e-16	SIAH2	3434	FALSE
PLAC8	OK	negbinomial.size	1.03967e-09	1.79554e-09	PLAC8	3580	TRUE
FBP1	OK	negbinomial.size	0.291881	0.313819	FBP1	2955	FALSE
HSPA5	OK	negbinomial.size	2.53386e-121	1.5729e-120	HSPA5	8592	TRUE
NEDD4L	OK	negbinomial.size	2.24895e-271	2.74039e-270	NEDD4L	4178	TRUE
TPBG	OK	negbinomial.size	1.42572e-30	4.06115e-30	TPBG	1675	FALSE
COL5A1	OK	negbinomial.size	1.41635e-33	4.27503e-33	COL5A1	278	FALSE
GPC1	OK	negbinomial.size	0.0167954	0.0204655	GPC1	1119	FALSE
TGM2	OK	negbinomial.size	1.3329e-06	2.02085e-06	TGM2	1885	FALSE
ETS1	OK	negbinomial.size	2.96047e-29	8.32474e-29	ETS1	1071	FALSE
HOXB9	OK	negbinomial.size	2.42601e-05	3.49303e-05	HOXB9	3507	FALSE
TGFB3	OK	negbinomial.size	2.95609e-07	4.60926e-07	TGFB3	87	FALSE
FASN	OK	negbinomial.size	1.32417e-16	2.81066e-16	FASN	4855	FALSE
LGALS3	OK	negbinomial.size	0	0	LGALS3	10252	TRUE
ANXA5	OK	negbinomial.size	9.87954e-65	4.42227e-64	ANXA5	5867	TRUE
TP53INP1	OK	negbinomial.size	3.21806e-07	4.99406e-07	TP53INP1	610	FALSE
CLU	OK	negbinomial.size	1.95275e-23	4.86707e-23	CLU	2852	FALSE
CXCL16	OK	negbinomial.size	1.11026e-247	1.23822e-246	CXCL16	5439	FALSE
TNFRSF12A	OK	negbinomial.size	1.34737e-08	2.23316e-08	TNFRSF12A	7074	TRUE
PPARG	OK	negbinomial.size	1.35897e-160	1.03779e-159	PPARG	3968	FALSE
CTNNB1	OK	negbinomial.size	2.03101e-22	4.94966e-22	CTNNB1	8282	FALSE
ARHGEF2	OK	negbinomial.size	0.0246897	0.0295379	ARHGEF2	2485	FALSE
KIF5B	OK	negbinomial.size	0.000109043	0.000151053	KIF5B	8590	FALSE
BIRC5	OK	negbinomial.size	3.87728e-10	6.82152e-10	BIRC5	3042	FALSE
NF1	OK	negbinomial.size	8.36852e-39	2.73955e-38	NF1	3908	FALSE
TSC1	OK	negbinomial.size	0.110009	0.123525	TSC1	1325	FALSE
RASA1	OK	negbinomial.size	9.42528e-05	0.000131117	RASA1	2329	FALSE
SMC3	OK	negbinomial.size	8.12782e-12	1.51504e-11	SMC3	5439	FALSE
GSN	OK	negbinomial.size	1.72048e-24	4.38789e-24	GSN	5434	FALSE
LATS1	OK	negbinomial.size	7.98348e-09	1.34351e-08	LATS1	2049	FALSE
TIAM1	OK	negbinomial.size	7.38412e-15	1.51836e-14	TIAM1	154	FALSE
FLNA	OK	negbinomial.size	5.2996e-25	1.37831e-24	FLNA	3582	FALSE
ARHGEF12	OK	negbinomial.size	0.813898	0.826458	ARHGEF12	4347	FALSE
EZR	OK	negbinomial.size	1.76871e-13	3.47407e-13	EZR	9239	TRUE
ECT2	OK	negbinomial.size	2.75952e-06	4.09879e-06	ECT2	3199	FALSE
AURKA	OK	negbinomial.size	5.81477e-07	8.91869e-07	AURKA	2469	FALSE
HDAC6	OK	negbinomial.size	0.136153	0.15057	HDAC6	1496	FALSE
DST	OK	negbinomial.size	4.01574e-108	2.2977e-107	DST	5446	TRUE
RASAL2	OK	negbinomial.size	8.84908e-144	6.19435e-143	RASAL2	2226	FALSE
SMC1A	OK	negbinomial.size	2.9821e-63	1.31693e-62	SMC1A	4772	FALSE
ACTN4	OK	negbinomial.size	1.09804e-16	2.36115e-16	ACTN4	9179	TRUE
CDC42	OK	negbinomial.size	3.40927e-73	1.61388e-72	CDC42	8584	FALSE
LMNB1	OK	negbinomial.size	0.00699582	0.00871827	LMNB1	2155	FALSE
ROCK1	OK	negbinomial.size	0.266549	0.287053	ROCK1	4160	FALSE
FSCN1	OK	negbinomial.size	1.75188e-43	6.19753e-43	FSCN1	1847	FALSE
NOTCH2	OK	negbinomial.size	0.386537	0.408253	NOTCH2	1565	FALSE
JAG2	OK	negbinomial.size	0.00355936	0.00455653	JAG2	1200	FALSE
NOTCH1	OK	negbinomial.size	3.74966e-05	5.32889e-05	NOTCH1	3098	FALSE
AXIN2	OK	negbinomial.size	8.0506e-68	3.73049e-67	AXIN2	3501	FALSE
NOTCH4	OK	negbinomial.size	0.336837	0.35922	NOTCH4	285	FALSE
LEF1	OK	negbinomial.size	1.06425e-08	1.77844e-08	LEF1	148	FALSE
AXIN1	OK	negbinomial.size	1.46573e-20	3.43221e-20	AXIN1	2897	FALSE
WNT5B	OK	negbinomial.size	4.11917e-83	2.06902e-82	WNT5B	367	FALSE
WNT6	OK	negbinomial.size	0.247483	0.267836	WNT6	37	FALSE
HDAC2	OK	negbinomial.size	0.823897	0.834037	HDAC2	7468	FALSE
DKK1	OK	negbinomial.size	0.599343	0.621052	DKK1	110	FALSE
TCF7	OK	negbinomial.size	5.60358e-40	1.87165e-39	TCF7	2597	FALSE
NUMB	OK	negbinomial.size	7.78684e-13	1.51143e-12	NUMB	3874	FALSE
ADAM17	OK	negbinomial.size	1.19391e-23	2.99845e-23	ADAM17	3151	FALSE
DVL2	OK	negbinomial.size	0.0103145	0.0127335	DVL2	1504	FALSE
NCSTN	OK	negbinomial.size	0.330991	0.354133	NCSTN	3215	FALSE
HDAC5	OK	negbinomial.size	0.849809	0.858947	HDAC5	1800	FALSE
CCND2	OK	negbinomial.size	1.1031e-41	3.7804e-41	CCND2	4875	FALSE
FRAT1	OK	negbinomial.size	1.7792e-06	2.67286e-06	FRAT1	292	FALSE
FZD8	OK	negbinomial.size	5.90981e-18	1.30492e-17	FZD8	175	FALSE
TP53	OK	negbinomial.size	1.61612e-32	4.74734e-32	TP53	4486	FALSE
SKP2	OK	negbinomial.size	0.0213287	0.0257038	SKP2	1444	FALSE
TGFBR1	OK	negbinomial.size	0.00228154	0.00294363	TGFBR1	1249	FALSE
SMAD7	OK	negbinomial.size	1.51907e-111	8.92453e-111	SMAD7	1245	FALSE
TGFB1	OK	negbinomial.size	2.8194e-43	9.92067e-43	TGFB1	438	FALSE
SMURF2	OK	negbinomial.size	4.73608e-84	2.39718e-83	SMURF2	2226	FALSE
SKIL	OK	negbinomial.size	5.42987e-163	4.20336e-162	SKIL	3793	FALSE
SKI	OK	negbinomial.size	7.4107e-35	2.28931e-34	SKI	2074	FALSE
ACVR1	OK	negbinomial.size	9.67398e-05	0.000134293	ACVR1	1052	FALSE
FURIN	OK	negbinomial.size	0.145108	0.159667	FURIN	2152	FALSE
MAP3K7	OK	negbinomial.size	3.89948e-05	5.52987e-05	MAP3K7	2701	FALSE
HIPK2	OK	negbinomial.size	0.00117611	0.0015416	HIPK2	3001	FALSE
ENG	OK	negbinomial.size	0.0643556	0.0740314	ENG	460	FALSE
CDH1	OK	negbinomial.size	0.00023995	0.000325541	CDH1	8222	FALSE
ID1	OK	negbinomial.size	0	0	ID1	7349	TRUE
TRIM33	OK	negbinomial.size	0.000690459	0.000914129	TRIM33	3589	FALSE
TJP1	OK	negbinomial.size	5.68544e-37	1.81603e-36	TJP1	4926	FALSE
NOG	OK	negbinomial.size	0.453829	0.476268	NOG	25	FALSE
WWTR1	OK	negbinomial.size	1.92455e-34	5.91753e-34	WWTR1	698	FALSE
THBS1	OK	negbinomial.size	2.0732e-151	1.49908e-150	THBS1	2663	FALSE
HDAC1	OK	negbinomial.size	6.59885e-46	2.39892e-45	HDAC1	7202	FALSE
RHOA	OK	negbinomial.size	0.000259601	0.000351477	RHOA	9064	FALSE
STAT1	OK	negbinomial.size	1.12134e-05	1.63239e-05	STAT1	4636	FALSE
STAT3	OK	negbinomial.size	1.48699e-90	7.82752e-90	STAT3	5752	FALSE
MYD88	OK	negbinomial.size	6.20741e-23	1.52977e-22	MYD88	2944	FALSE
ITGB3	OK	negbinomial.size	0.110737	0.12392	ITGB3	14	FALSE
CD14	OK	negbinomial.size	0.124003	0.13853	CD14	526	FALSE
CXCL13	OK	negbinomial.size	1.30477e-16	2.77844e-16	CXCL13	254	FALSE
FAS	OK	negbinomial.size	0.12686	0.141481	FAS	726	FALSE
PTPN11	OK	negbinomial.size	1.33798e-08	2.22322e-08	PTPN11	4408	FALSE
CXCL9	OK	negbinomial.size	0.821022	0.832407	CXCL9	237	FALSE
CD36	OK	negbinomial.size	1.73358e-08	2.85174e-08	CD36	99	FALSE
NME1	OK	negbinomial.size	1.69882e-48	6.31539e-48	NME1	8001	TRUE
BRF2	OK	negbinomial.size	0.0438298	0.0510442	BRF2	1225	FALSE
TYMS	OK	negbinomial.size	7.2793e-05	0.00010191	TYMS	2326	FALSE
CCNA2	OK	negbinomial.size	0.100143	0.113415	CCNA2	1556	FALSE
CKS2	OK	negbinomial.size	1.71532e-10	3.06707e-10	CKS2	8065	FALSE
HMGB3	OK	negbinomial.size	0.00106282	0.00139588	HMGB3	5137	FALSE
TACC3	OK	negbinomial.size	9.03771e-06	1.31858e-05	TACC3	1566	FALSE
EZH2	OK	negbinomial.size	1.00226e-50	3.76849e-50	EZH2	2804	FALSE
E2F1	OK	negbinomial.size	1.96649e-07	3.09558e-07	E2F1	1203	FALSE
KMT5A	OK	negbinomial.size	4.44476e-14	8.80919e-14	KMT5A	2711	FALSE
MYBL2	OK	negbinomial.size	3.90817e-26	1.04962e-25	MYBL2	1669	FALSE
CUL3	OK	negbinomial.size	3.07532e-32	8.93263e-32	CUL3	4719	FALSE
MAPK14	OK	negbinomial.size	6.58618e-40	2.18874e-39	MAPK14	3081	FALSE
CUL4A	OK	negbinomial.size	5.38556e-26	1.4347e-25	CUL4A	5988	FALSE
FOXN3	OK	negbinomial.size	1.12117e-93	5.99781e-93	FOXN3	2320	FALSE
HIF1A	OK	negbinomial.size	6.34822e-10	1.10215e-09	HIF1A	3384	FALSE
NCL	OK	negbinomial.size	1.08359e-12	2.09092e-12	NCL	9092	FALSE
EGF	OK	negbinomial.size	0.000371393	0.000498728	EGF	50	FALSE
G3BP1	OK	negbinomial.size	0.642881	0.664075	G3BP1	6017	FALSE
TNFSF10	OK	negbinomial.size	2.03038e-19	4.6713e-19	TNFSF10	4406	FALSE
F2R	OK	negbinomial.size	7.33436e-11	1.32219e-10	F2R	222	FALSE
SATB1	OK	negbinomial.size	0.362205	0.385219	SATB1	1382	FALSE
CREBBP	OK	negbinomial.size	2.6353e-12	5.01164e-12	CREBBP	3379	FALSE
PDGFRB	OK	negbinomial.size	1.18749e-39	3.92646e-39	PDGFRB	213	FALSE
TIMP1	OK	negbinomial.size	0	0	TIMP1	8491	TRUE
HSPB1	OK	negbinomial.size	0	0	HSPB1	9189	TRUE
TIMP2	OK	negbinomial.size	5.79423e-05	8.14659e-05	TIMP2	1674	FALSE
TIMP3	OK	negbinomial.size	0	0	TIMP3	2579	TRUE
HGF	OK	negbinomial.size	7.13511e-08	1.15071e-07	HGF	26	FALSE
LUM	OK	negbinomial.size	7.03398e-61	3.02507e-60	LUM	1334	TRUE
LMNA	OK	negbinomial.size	5.43472210425371e-321	7.45001587364016e-320	LMNA	9096	TRUE
PTK2	OK	negbinomial.size	1.14129e-135	7.58555e-135	PTK2	4554	FALSE
MMP2	OK	negbinomial.size	1.08088e-27	2.97581e-27	MMP2	609	FALSE
BRCA1	OK	negbinomial.size	7.49606e-07	1.14441e-06	BRCA1	1287	FALSE
KRT18	OK	negbinomial.size	0	0	KRT18	10629	TRUE
TGFB2	OK	negbinomial.size	1.59237e-06	2.39766e-06	TGFB2	64	FALSE
TGFBR3	OK	negbinomial.size	0.00164942	0.00214066	TGFBR3	1379	FALSE
TXNIP	OK	negbinomial.size	4.87144e-103	2.71645e-102	TXNIP	6048	TRUE
BCL2L1	OK	negbinomial.size	0	0	BCL2L1	6385	TRUE
F2	OK	negbinomial.size	0.109412	0.123065	F2	34	FALSE
ANXA1	OK	negbinomial.size	1.51151e-05	2.19553e-05	ANXA1	4612	TRUE
PDCD4	OK	negbinomial.size	1.55791e-35	4.90482e-35	PDCD4	4749	FALSE
ERBB2	OK	negbinomial.size	0.334264	0.357054	ERBB2	4159	FALSE
PAK1	OK	negbinomial.size	0.00760876	0.00942856	PAK1	4756	FALSE
NOTCH3	OK	negbinomial.size	1.48587e-26	4.02346e-26	NOTCH3	225	FALSE
FZD7	OK	negbinomial.size	1.5929e-08	2.6269e-08	FZD7	1236	FALSE
WNT5A	OK	negbinomial.size	0.00666334	0.00833551	WNT5A	90	FALSE
SKP1	OK	negbinomial.size	2.14439e-128	1.39704e-127	SKP1	9542	FALSE
ARRB1	OK	negbinomial.size	0.000144215	0.000198521	ARRB1	1544	FALSE
IDH1	OK	negbinomial.size	2.11384e-13	4.12733e-13	IDH1	6080	FALSE
YWHAG	OK	negbinomial.size	0.0952806	0.108281	YWHAG	6687	FALSE
ESRRA	OK	negbinomial.size	5.19104e-05	7.31414e-05	ESRRA	5866	FALSE
CD151	OK	negbinomial.size	5.3584e-127	3.45669e-126	CD151	8475	FALSE
COL4A1	OK	negbinomial.size	5.54931e-46	2.02858e-45	COL4A1	682	FALSE
MYLK	OK	negbinomial.size	1.10713e-46	4.0698e-46	MYLK	598	FALSE
MGLL	OK	negbinomial.size	0.00028149	0.000380329	MGLL	5903	FALSE
UCP2	OK	negbinomial.size	8.24893e-10	1.42837e-09	UCP2	2537	FALSE
SLC9A3R1	OK	negbinomial.size	2.36825e-53	9.27563e-53	SLC9A3R1	6273	FALSE
MYB	OK	negbinomial.size	5.71894e-29	1.6013e-28	MYB	3297	FALSE
IGFBP4	OK	negbinomial.size	3.07593e-42	1.06524e-41	IGFBP4	4268	FALSE
KRT19	OK	negbinomial.size	0	0	KRT19	9919	TRUE
LRIG1	OK	negbinomial.size	1.53515e-09	2.6374e-09	LRIG1	2200	FALSE
KDM4B	OK	negbinomial.size	2.34387e-198	2.11269e-197	KDM4B	2321	TRUE
XBP1	OK	negbinomial.size	0.178522	0.195779	XBP1	7842	FALSE
FHL2	OK	negbinomial.size	4.564e-59	1.88875e-58	FHL2	7788	FALSE
OVOL2	OK	negbinomial.size	3.98051e-33	1.19053e-32	OVOL2	1503	FALSE
MUC1	OK	negbinomial.size	2.01506e-212	1.94987e-211	MUC1	4273	TRUE
CXCL12	OK	negbinomial.size	5.18662e-17	1.12634e-16	CXCL12	216	FALSE
GJA1	OK	negbinomial.size	0.000611273	0.000814205	GJA1	81	FALSE
AQP3	OK	negbinomial.size	3.30418e-238	3.5067e-237	AQP3	1640	FALSE
FOXC1	OK	negbinomial.size	0.00075266	0.000994479	FOXC1	485	FALSE
CLDN7	OK	negbinomial.size	0	0	CLDN7	9521	TRUE
JAK2	OK	negbinomial.size	5.38478e-06	7.94436e-06	JAK2	1038	FALSE
P2RY2	OK	negbinomial.size	0.051648	0.0599372	P2RY2	503	FALSE
KRT8	OK	negbinomial.size	0	0	KRT8	10610	TRUE
ESRP2	OK	negbinomial.size	0.0206547	0.0249831	ESRP2	2070	FALSE
IGF1R	OK	negbinomial.size	4.55636e-122	2.88277e-121	IGF1R	2168	FALSE
AR	OK	negbinomial.size	0.0286031	0.0339726	AR	10	FALSE
SLC39A6	OK	negbinomial.size	1.23585e-12	2.37775e-12	SLC39A6	2387	FALSE
GAB2	OK	negbinomial.size	2.87733e-52	1.10074e-51	GAB2	810	FALSE
FKBP5	OK	negbinomial.size	2.27669e-61	9.85566e-61	FKBP5	1327	FALSE
AGR2	OK	negbinomial.size	0	0	AGR2	9510	TRUE
PKP3	OK	negbinomial.size	3.43986e-109	1.98546e-108	PKP3	7598	FALSE
S100A9	OK	negbinomial.size	6.80128e-07	1.04075e-06	S100A9	2372	FALSE
MEST	OK	negbinomial.size	2.11203e-10	3.74587e-10	MEST	5240	FALSE
CXCL14	OK	negbinomial.size	1.37215e-160	1.03779e-159	CXCL14	817	TRUE
SCUBE2	OK	negbinomial.size	0.490698	0.510885	SCUBE2	18	FALSE
LAMC2	OK	negbinomial.size	5.05072e-07	7.78307e-07	LAMC2	4518	FALSE
TFPI2	OK	negbinomial.size	0.923278	0.927506	TFPI2	104	FALSE
IDH2	OK	negbinomial.size	0.141701	0.156442	IDH2	7416	FALSE
MDK	OK	negbinomial.size	0	0	MDK	7434	TRUE
ST14	OK	negbinomial.size	0.0207168	0.0250122	ST14	7997	FALSE
PTPN6	OK	negbinomial.size	2.81214e-11	5.15429e-11	PTPN6	2392	FALSE
INPP4B	OK	negbinomial.size	8.11596e-09	1.36232e-08	INPP4B	2105	FALSE
ITGAV	OK	negbinomial.size	0.00605774	0.0076269	ITGAV	2939	FALSE
SPDEF	OK	negbinomial.size	0.00035763	0.000481228	SPDEF	919	FALSE
HPGD	OK	negbinomial.size	3.75924e-78	1.84596e-77	HPGD	2435	FALSE
SRF	OK	negbinomial.size	3.0418e-35	9.48579e-35	SRF	3020	FALSE
AKT1	OK	negbinomial.size	2.40423e-07	3.76662e-07	AKT1	3425	FALSE
CRYAB	OK	negbinomial.size	6.69972e-32	1.92507e-31	CRYAB	1022	FALSE
ADAM12	OK	negbinomial.size	8.01059e-06	1.17394e-05	ADAM12	113	FALSE
TPM2	OK	negbinomial.size	1.67196e-169	1.35821e-168	TPM2	2443	TRUE
FHL1	OK	negbinomial.size	2.10573e-13	4.12373e-13	FHL1	229	FALSE
ITGB5	OK	negbinomial.size	0.000555185	0.000740998	ITGB5	2404	FALSE
COL3A1	OK	negbinomial.size	3.17808e-169	2.55022e-168	COL3A1	1472	TRUE
IGFBP7	OK	negbinomial.size	2.16781e-242	2.37736e-241	IGFBP7	2556	TRUE
MEF2D	OK	negbinomial.size	2.42077e-42	8.42786e-42	MEF2D	2562	FALSE
HSPB2	OK	negbinomial.size	0.0578486	0.0667796	HSPB2	26	FALSE
COL4A2	OK	negbinomial.size	1.14875e-33	3.48332e-33	COL4A2	1461	FALSE
SGCD	OK	negbinomial.size	0.000236833	0.000321975	SGCD	36	FALSE
FGF2	OK	negbinomial.size	2.39217e-07	3.75668e-07	FGF2	57	FALSE
KLF5	OK	negbinomial.size	1.63143e-09	2.79552e-09	KLF5	8639	FALSE
TAGLN	OK	negbinomial.size	6.13697e-114	3.67102e-113	TAGLN	1364	TRUE
AKT2	OK	negbinomial.size	3.67857e-08	5.97654e-08	AKT2	3110	FALSE
LAMA2	OK	negbinomial.size	2.76372e-08	4.51248e-08	LAMA2	107	FALSE
COL6A3	OK	negbinomial.size	1.01159e-59	4.26684e-59	COL6A3	600	FALSE
IGF1	OK	negbinomial.size	5.48911e-07	8.43886e-07	IGF1	86	FALSE
PTP4A3	OK	negbinomial.size	9.43318e-26	2.49278e-25	PTP4A3	2448	FALSE
ITGB1	OK	negbinomial.size	1.69148e-30	4.79737e-30	ITGB1	8095	FALSE
COL1A1	OK	negbinomial.size	3.03501e-279	3.91575e-278	COL1A1	2149	TRUE
CDH13	OK	negbinomial.size	1.56238e-25	4.09579e-25	CDH13	313	FALSE
SLC6A8	OK	negbinomial.size	5.82689e-17	1.26122e-16	SLC6A8	4579	FALSE
RB1	OK	negbinomial.size	0.000120441	0.000166143	RB1	3064	FALSE
TSC2	OK	negbinomial.size	0.134088	0.148786	TSC2	2496	FALSE
EPHB3	OK	negbinomial.size	2.69518e-09	4.5825e-09	EPHB3	2455	FALSE
ITGB4	OK	negbinomial.size	1.38021e-188	1.22727e-187	ITGB4	6113	TRUE
FOXO4	OK	negbinomial.size	0.946402	0.947842	FOXO4	679	FALSE
COL6A2	OK	negbinomial.size	6.46899e-79	3.20045e-78	COL6A2	659	FALSE
SPARC	OK	negbinomial.size	8.18011e-117	4.93809e-116	SPARC	1603	TRUE
RAB22A	OK	negbinomial.size	9.73212e-29	2.702e-28	RAB22A	5414	FALSE
ADAM10	OK	negbinomial.size	0.00443806	0.00565939	ADAM10	4415	FALSE
MAPK1	OK	negbinomial.size	0.435553	0.45855	MAPK1	4201	FALSE
CD63	OK	negbinomial.size	0	0	CD63	9865	TRUE
ISG15	OK	negbinomial.size	0	0	ISG15	6774	TRUE
NMI	OK	negbinomial.size	6.72404e-49	2.51388e-48	NMI	4680	FALSE
IL15	OK	negbinomial.size	0.381453	0.40353	IL15	707	FALSE
BATF2	OK	negbinomial.size	7.9288e-06	1.16454e-05	BATF2	2324	FALSE
IRF8	OK	negbinomial.size	0.106059	0.119702	IRF8	3309	FALSE
PLA2G4A	OK	negbinomial.size	4.39571e-07	6.8056e-07	PLA2G4A	368	FALSE
VCAM1	OK	negbinomial.size	7.61416e-05	0.000106372	VCAM1	67	FALSE
CD274	OK	negbinomial.size	0.0563776	0.0653107	CD274	237	FALSE
MTHFD2	OK	negbinomial.size	3.57552e-19	8.14081e-19	MTHFD2	5793	FALSE
NCOA3	OK	negbinomial.size	5.20872e-151	3.72537e-150	NCOA3	3030	FALSE
SRI	OK	negbinomial.size	0.000684465	0.000908021	SRI	8735	FALSE
CTNND1	OK	negbinomial.size	2.80337e-85	1.42994e-84	CTNND1	6820	FALSE
LIMA1	OK	negbinomial.size	0.142599	0.157169	LIMA1	6462	FALSE
THY1	OK	negbinomial.size	5.72128e-23	1.41526e-22	THY1	376	FALSE
ZYX	OK	negbinomial.size	0.0132481	0.0162333	ZYX	4621	FALSE
CLDN4	OK	negbinomial.size	9.84485e-77	4.7284e-76	CLDN4	9750	TRUE
ITGA3	OK	negbinomial.size	1.12805e-56	4.58184e-56	ITGA3	3142	FALSE
CDH6	OK	negbinomial.size	0.00227325	0.0029387	CDH6	31	FALSE
IRS1	OK	negbinomial.size	1.19336e-14	2.43105e-14	IRS1	1366	FALSE
CDH11	OK	negbinomial.size	5.57502e-16	1.16456e-15	CDH11	142	FALSE
LAMA3	OK	negbinomial.size	0.181573	0.198464	LAMA3	3899	FALSE
COL16A1	OK	negbinomial.size	8.29821e-25	2.14126e-24	COL16A1	1506	FALSE
SRC	OK	negbinomial.size	4.63525e-12	8.71427e-12	SRC	2490	FALSE
PTEN	OK	negbinomial.size	1.81118e-14	3.6334e-14	PTEN	4140	FALSE
VCAN	OK	negbinomial.size	1.31283e-27	3.59933e-27	VCAN	201	FALSE
MYL9	OK	negbinomial.size	5.69832e-55	2.27242e-54	MYL9	2627	FALSE
CX3CL1	OK	negbinomial.size	0.182332	0.198962	CX3CL1	423	FALSE
FBN1	OK	negbinomial.size	5.51118e-12	1.03315e-11	FBN1	154	FALSE
MSN	OK	negbinomial.size	4.97659e-37	1.59736e-36	MSN	637	FALSE
ITGA2	OK	negbinomial.size	5.52861e-41	1.86555e-40	ITGA2	4282	FALSE
SLIT2	OK	negbinomial.size	4.61423e-60	1.95882e-59	SLIT2	185	FALSE
SHC1	OK	negbinomial.size	0.0267246	0.0317989	SHC1	3047	FALSE
PIK3R3	OK	negbinomial.size	4.66408e-152	3.40996e-151	PIK3R3	981	FALSE
BMP1	OK	negbinomial.size	0.00681767	0.00851239	BMP1	1019	FALSE
ACTG2	OK	negbinomial.size	0.0124582	0.0152938	ACTG2	104	FALSE
IKBKG	OK	negbinomial.size	0.0406912	0.0475574	IKBKG	1719	FALSE
HRAS	OK	negbinomial.size	6.83529e-19	1.54557e-18	HRAS	4061	FALSE
MMP9	OK	negbinomial.size	0.75208	0.770824	MMP9	280	FALSE
TNFRSF11B	OK	negbinomial.size	1.40242e-24	3.59063e-24	TNFRSF11B	1054	FALSE
PKD1	OK	negbinomial.size	2.53411e-16	5.36156e-16	PKD1	1999	FALSE
EXOC4	OK	negbinomial.size	1.14112e-154	8.53248e-154	EXOC4	3143	FALSE
LYPD3	OK	negbinomial.size	0.0853036	0.0972787	LYPD3	541	FALSE
LYN	OK	negbinomial.size	0.0658423	0.0756095	LYN	3901	FALSE
GAS1	OK	negbinomial.size	0.133963	0.148786	GAS1	42	FALSE
FLOT2	OK	negbinomial.size	8.35217e-08	1.34042e-07	FLOT2	2384	FALSE
GATA3	OK	negbinomial.size	2.92699e-18	6.52867e-18	GATA3	166	FALSE
AFAP1L2	OK	negbinomial.size	0.766872	0.784762	AFAP1L2	494	FALSE
SHH	OK	negbinomial.size	1.45283e-08	2.40192e-08	SHH	1861	FALSE
NRP1	OK	negbinomial.size	0.00347483	0.00445699	NRP1	352	FALSE
SCG2	OK	negbinomial.size	1.58344e-05	2.28989e-05	SCG2	24	FALSE
GLI1	OK	negbinomial.size	0.0819179	0.0935798	GLI1	43	FALSE
NRP2	OK	negbinomial.size	3.83135e-22	9.23454e-22	NRP2	715	FALSE
TLE1	OK	negbinomial.size	1.46794e-56	5.92581e-56	TLE1	3571	FALSE
L1CAM	OK	negbinomial.size	0.0142875	0.0174743	L1CAM	313	FALSE
CRMP1	OK	negbinomial.size	0.025164	0.0300507	CRMP1	16	FALSE
MMP14	OK	negbinomial.size	3.06656e-31	8.77304e-31	MMP14	1848	FALSE
CTSL	OK	negbinomial.size	0.00121849	0.00159397	CTSL	1773	FALSE
MMP13	OK	negbinomial.size	1.5339e-05	2.22314e-05	MMP13	37	FALSE
CD59	OK	negbinomial.size	1.88921e-226	1.91246e-225	CD59	7473	FALSE
CBLB	OK	negbinomial.size	3.80719e-74	1.81531e-73	CBLB	2112	FALSE
FN1	OK	negbinomial.size	7.85617e-268	9.231e-267	FN1	1889	TRUE
LRP1	OK	negbinomial.size	3.71011e-64	1.6495e-63	LRP1	2676	FALSE
ZEB1	OK	negbinomial.size	1.94376e-25	5.07537e-25	ZEB1	260	FALSE
PIK3CA	OK	negbinomial.size	4.39069e-11	8.00297e-11	PIK3CA	1540	FALSE
RHOG	OK	negbinomial.size	1.21672e-16	2.60782e-16	RHOG	4438	FALSE
DYRK2	OK	negbinomial.size	0.000183557	0.000252151	DYRK2	4099	FALSE
ANG	OK	negbinomial.size	0	0	ANG	4203	TRUE
RAF1	OK	negbinomial.size	2.24241e-06	3.33824e-06	RAF1	3703	FALSE
HNF4A	OK	negbinomial.size	0	0	HNF4A	6402	TRUE
EIF2AK3	OK	negbinomial.size	3.91636e-89	2.04521e-88	EIF2AK3	1541	FALSE
ERN1	OK	negbinomial.size	2.40451e-59	1.00775e-58	ERN1	2792	FALSE
EIF2S1	OK	negbinomial.size	2.93701e-19	6.71024e-19	EIF2S1	5534	FALSE
EIF4E	OK	negbinomial.size	2.749e-19	6.30259e-19	EIF4E	6978	FALSE
BAG3	OK	negbinomial.size	9.54313e-137	6.40753e-136	BAG3	4141	TRUE
EIF4G1	OK	negbinomial.size	4.77355e-19	1.0831e-18	EIF4G1	6234	FALSE
YWHAZ	OK	negbinomial.size	5.80904e-29	1.61964e-28	YWHAZ	9753	FALSE
IMP3	OK	negbinomial.size	8.29218e-16	1.72666e-15	IMP3	6269	FALSE
MAPK8	OK	negbinomial.size	0.186211	0.202858	MAPK8	2976	FALSE
GSK3B	OK	negbinomial.size	1.50237e-125	9.59767e-125	GSK3B	4204	FALSE
RAC1	OK	negbinomial.size	5.17816e-08	8.37157e-08	RAC1	9436	TRUE
TBK1	OK	negbinomial.size	1.1079e-08	1.84557e-08	TBK1	2457	FALSE
CSNK2B	OK	negbinomial.size	1.74813e-11	3.21305e-11	CSNK2B	7700	FALSE
PRKAA2	OK	negbinomial.size	7.77204e-15	1.59315e-14	PRKAA2	261	FALSE
PIN1	OK	negbinomial.size	3.20057e-36	1.01249e-35	PIN1	6218	FALSE
SMAD2	OK	negbinomial.size	1.87513e-05	2.70578e-05	SMAD2	4002	FALSE
PAK4	OK	negbinomial.size	0.000199686	0.000273167	PAK4	3625	FALSE
PLOD2	OK	negbinomial.size	8.05087e-120	4.95091e-119	PLOD2	2005	FALSE
SERPINH1	OK	negbinomial.size	3.18556e-38	1.03256e-37	SERPINH1	4879	FALSE
EGLN3	OK	negbinomial.size	0.0300007	0.0355684	EGLN3	2607	FALSE
PRDX1	OK	negbinomial.size	0	0	PRDX1	9817	FALSE
PSME3	OK	negbinomial.size	1.06883e-11	1.97e-11	PSME3	4604	FALSE
HSPA4	OK	negbinomial.size	0.261731	0.282326	HSPA4	4761	FALSE
DNMT1	OK	negbinomial.size	0.00436804	0.00558092	DNMT1	3795	FALSE
EED	OK	negbinomial.size	0.301274	0.32339	EED	2143	FALSE
MCM7	OK	negbinomial.size	0.00606211	0.0076269	MCM7	4573	FALSE
TIMELESS	OK	negbinomial.size	0.046655	0.0542385	TIMELESS	1225	FALSE
PPM1D	OK	negbinomial.size	9.33251e-25	2.39875e-24	PPM1D	1479	FALSE
PPP1R8	OK	negbinomial.size	1.45272e-21	3.45085e-21	PPP1R8	2858	FALSE
CDKN2A	OK	negbinomial.size	0	0	CDKN2A	3087	TRUE
RACK1	OK	negbinomial.size	0	0	RACK1	915	TRUE
PCBP1	OK	negbinomial.size	8.93657e-44	3.1958e-43	PCBP1	8655	FALSE
GLO1	OK	negbinomial.size	2.27982e-96	1.2501e-95	GLO1	6626	TRUE
TRIM28	OK	negbinomial.size	0.0183972	0.0223759	TRIM28	5977	FALSE
HDGF	OK	negbinomial.size	0.178858	0.195821	HDGF	7509	FALSE
TUFM	OK	negbinomial.size	4.76245e-17	1.03765e-16	TUFM	8355	FALSE
COL5A2	OK	negbinomial.size	7.13207e-34	2.18274e-33	COL5A2	407	FALSE
COL1A2	OK	negbinomial.size	3.13197e-206	2.98672e-205	COL1A2	1729	TRUE
LAMC1	OK	negbinomial.size	9.37837e-33	2.77972e-32	LAMC1	1941	FALSE
COL7A1	OK	negbinomial.size	0.00602288	0.00760663	COL7A1	209	FALSE
LOXL2	OK	negbinomial.size	3.58811e-14	7.15448e-14	LOXL2	190	FALSE
THBS2	OK	negbinomial.size	3.47729e-24	8.80022e-24	THBS2	241	FALSE
NNMT	OK	negbinomial.size	4.36557e-12	8.23079e-12	NNMT	570	FALSE
TPM1	OK	negbinomial.size	1.04135e-96	5.75804e-96	TPM1	9489	TRUE
CDH2	OK	negbinomial.size	0.0110404	0.0136041	CDH2	11	FALSE
COL11A1	OK	negbinomial.size	5.04429e-10	8.85104e-10	COL11A1	57	FALSE
FAP	OK	negbinomial.size	0.000631815	0.000839868	FAP	276	FALSE
FSTL1	OK	negbinomial.size	1.42992e-14	2.89504e-14	FSTL1	480	FALSE
POSTN	OK	negbinomial.size	2.21941e-41	7.56668e-41	POSTN	372	FALSE
SPP1	OK	negbinomial.size	2.58595e-105	1.46686e-104	SPP1	1531	FALSE
NID2	OK	negbinomial.size	0.039751	0.0466242	NID2	270	FALSE
MMP3	OK	negbinomial.size	0.00151921	0.00197948	MMP3	330	FALSE
VIM	OK	negbinomial.size	4.85046e-129	3.1916e-128	VIM	2498	TRUE
LOXL1	OK	negbinomial.size	0.232644	0.252191	LOXL1	236	FALSE
FBLN5	OK	negbinomial.size	1.25278e-07	1.99595e-07	FBLN5	96	FALSE
COL12A1	OK	negbinomial.size	1.01132e-26	2.7498e-26	COL12A1	327	FALSE
ELN	OK	negbinomial.size	1.56049e-14	3.1497e-14	ELN	289	FALSE
COMP	OK	negbinomial.size	1.52465e-09	2.62622e-09	COMP	154	FALSE
SPOCK1	OK	negbinomial.size	1.22244e-06	1.85766e-06	SPOCK1	62	FALSE
IL32	OK	negbinomial.size	0	0	IL32	9649	TRUE
QSOX1	OK	negbinomial.size	0	0	QSOX1	5665	TRUE
EDIL3	OK	negbinomial.size	2.7343e-10	4.83647e-10	EDIL3	60	FALSE
CALD1	OK	negbinomial.size	1.39979e-241	1.50994e-240	CALD1	1063	TRUE
MAGEE1	OK	negbinomial.size	0.485748	0.506533	MAGEE1	43	FALSE
FBLN1	OK	negbinomial.size	6.27723e-39	2.06521e-38	FBLN1	473	FALSE
SGCB	OK	negbinomial.size	2.46632e-05	3.54332e-05	SGCB	1858	FALSE
ECM1	OK	negbinomial.size	8.20834241147251e-317	1.10226312382631e-315	ECM1	2149	TRUE
FSTL3	OK	negbinomial.size	0.593779	0.616834	FSTL3	1522	FALSE
DAB2	OK	negbinomial.size	0.933777	0.936624	DAB2	2971	FALSE
EMP3	OK	negbinomial.size	0.000488314	0.000653071	EMP3	1870	FALSE
BASP1	OK	negbinomial.size	1.78549e-23	4.46711e-23	BASP1	213	FALSE
ITGA5	OK	negbinomial.size	5.35077e-10	9.339e-10	ITGA5	192	FALSE
MGP	OK	negbinomial.size	1.04489e-25	2.75016e-25	MGP	1455	TRUE
SDC1	OK	negbinomial.size	9.39957e-141	6.44262e-140	SDC1	6140	FALSE
PCOLCE	OK	negbinomial.size	1.12343e-22	2.74803e-22	PCOLCE	540	FALSE
GREM1	OK	negbinomial.size	3.30452e-22	7.99402e-22	GREM1	429	FALSE
COL5A3	OK	negbinomial.size	8.3798e-08	1.34158e-07	COL5A3	133	FALSE
HTRA1	OK	negbinomial.size	3.87225e-23	9.61488e-23	HTRA1	507	FALSE
SNTB1	OK	negbinomial.size	0.0236393	0.0283327	SNTB1	2202	FALSE
LRRC15	OK	negbinomial.size	0.00295818	0.00380916	LRRC15	14	FALSE
ACTA2	OK	negbinomial.size	1.613e-43	5.73703e-43	ACTA2	950	FALSE
EFEMP2	OK	negbinomial.size	1.24355e-16	2.65668e-16	EFEMP2	207	FALSE
MATN2	OK	negbinomial.size	0.0428019	0.0499355	MATN2	311	FALSE
PCOLCE2	OK	negbinomial.size	0.104436	0.118074	PCOLCE2	90	FALSE
SERPINE2	OK	negbinomial.size	4.10061e-12	7.75346e-12	SERPINE2	4093	FALSE
ABI3BP	OK	negbinomial.size	1.57466e-13	3.10217e-13	ABI3BP	48	FALSE
FUCA1	OK	negbinomial.size	2.58993e-17	5.68059e-17	FUCA1	3921	FALSE
SLIT3	OK	negbinomial.size	1.3099e-14	2.66023e-14	SLIT3	74	FALSE
LAMA1	OK	negbinomial.size	0.0053504	0.00678336	LAMA1	408	FALSE
COL8A2	OK	negbinomial.size	0.0032498	0.0041765	COL8A2	15	FALSE
FBN2	OK	negbinomial.size	0.988793	0.988793	FBN2	62	FALSE
IGFBP2	OK	negbinomial.size	0.0572736	0.0662321	IGFBP2	5771	TRUE
PFN2	OK	negbinomial.size	5.35558e-18	1.18652e-17	PFN2	2771	FALSE
CXCL8	OK	negbinomial.size	0	0	CXCL8	5731	TRUE
GLIPR1	OK	negbinomial.size	6.71984e-41	2.25595e-40	GLIPR1	919	FALSE
ANPEP	OK	negbinomial.size	0.229026	0.248678	ANPEP	1042	FALSE
P3H1	OK	negbinomial.size	0.594335	0.616834	P3H1	582	FALSE
VEGFC	OK	negbinomial.size	0.419518	0.442377	VEGFC	14	FALSE
PLOD1	OK	negbinomial.size	0.607567	0.628584	PLOD1	2225	FALSE
MATN3	OK	negbinomial.size	1.25968e-12	2.41653e-12	MATN3	45	FALSE
CALU	OK	negbinomial.size	0.00628109	0.0078723	CALU	5423	FALSE
PRRX1	OK	negbinomial.size	7.10306e-11	1.28401e-10	PRRX1	99	FALSE
FMOD	OK	negbinomial.size	3.13018e-09	5.30839e-09	FMOD	420	FALSE
SFRP1	OK	negbinomial.size	0.00083754	0.0011022	SFRP1	23	FALSE
PLOD3	OK	negbinomial.size	3.65734e-56	1.4674e-55	PLOD3	5725	FALSE
APLP1	OK	negbinomial.size	4.50309e-05	6.35845e-05	APLP1	35	FALSE
FBLN2	OK	negbinomial.size	9.29097e-12	1.7221e-11	FBLN2	245	FALSE
MSX1	OK	negbinomial.size	4.07914e-18	9.06783e-18	MSX1	1132	FALSE
FERMT2	OK	negbinomial.size	1.39064e-07	2.21025e-07	FERMT2	94	FALSE
SNAI2	OK	negbinomial.size	0.000221875	0.000302264	SNAI2	89	FALSE
TPM4	OK	negbinomial.size	8.30532e-12	1.54376e-11	TPM4	9344	FALSE
PMP22	OK	negbinomial.size	3.88358e-138	2.63443e-137	PMP22	2244	FALSE
COPA	OK	negbinomial.size	0.175889	0.193214	COPA	5424	FALSE
MFAP5	OK	negbinomial.size	0.00160889	0.00209219	MFAP5	57	FALSE
PTHLH	OK	negbinomial.size	0.0164434	0.0200738	PTHLH	44	FALSE
SFRP4	OK	negbinomial.size	9.1231e-15	1.86429e-14	SFRP4	303	FALSE
LGALS1	OK	negbinomial.size	4.28545e-08	6.94539e-08	LGALS1	4337	TRUE
RGS4	OK	negbinomial.size	4.39976e-06	6.50571e-06	RGS4	24	FALSE
NT5E	OK	negbinomial.size	1.77357e-166	1.38929e-165	NT5E	2613	FALSE
DPYSL3	OK	negbinomial.size	3.75925e-12	7.12848e-12	DPYSL3	260	FALSE
PPIB	OK	negbinomial.size	2.08568e-271	2.58939e-270	PPIB	9222	TRUE
PDLIM4	OK	negbinomial.size	5.00912e-09	8.47301e-09	PDLIM4	431	FALSE
CTHRC1	OK	negbinomial.size	3.87458e-14	7.70234e-14	CTHRC1	615	FALSE
ECM2	OK	negbinomial.size	1.55427e-10	2.78668e-10	ECM2	50	FALSE
CRLF1	OK	negbinomial.size	0.00991133	0.0122587	CRLF1	85	FALSE
PRSS2	OK	negbinomial.size	9.43445e-77	4.56461e-76	PRSS2	343	FALSE
CADM1	OK	negbinomial.size	1.01621e-32	2.9985e-32	CADM1	333	FALSE
OXTR	OK	negbinomial.size	0.451864	0.474963	OXTR	174	FALSE
MMP1	OK	negbinomial.size	1.63923e-19	3.79793e-19	MMP1	986	FALSE
CAPG	OK	negbinomial.size	2.11774e-28	5.85492e-28	CAPG	6332	FALSE
CAP2	OK	negbinomial.size	2.88029e-35	9.02491e-35	CAP2	551	FALSE
MXRA5	OK	negbinomial.size	8.04094e-17	1.73473e-16	MXRA5	175	FALSE
FOXC2	OK	negbinomial.size	3.11918e-05	4.45211e-05	FOXC2	41	FALSE
NTM	OK	negbinomial.size	2.91843e-08	4.75329e-08	NTM	56	FALSE
BDNF	OK	negbinomial.size	0.720243	0.7405	BDNF	32	FALSE
PVR	OK	negbinomial.size	3.11953e-07	4.8526e-07	PVR	2806	FALSE
COLGALT1	OK	negbinomial.size	0.127274	0.141703	COLGALT1	3397	FALSE
GPX7	OK	negbinomial.size	0.00020744	0.000283186	GPX7	385	FALSE
WIPF1	OK	negbinomial.size	1.21393e-36	3.85878e-36	WIPF1	507	FALSE
CCL22	OK	negbinomial.size	8.49935e-06	1.24279e-05	CCL22	74	FALSE
CCR7	OK	negbinomial.size	6.57601e-11	1.19201e-10	CCR7	95	FALSE
AQP9	OK	negbinomial.size	0.209738	0.228112	AQP9	74	FALSE
OSM	OK	negbinomial.size	0.000193508	0.000265267	OSM	120	FALSE
TNFSF15	OK	negbinomial.size	5.07647e-35	1.57562e-34	TNFSF15	1315	FALSE
NLRP3	OK	negbinomial.size	0.693692	0.714318	NLRP3	57	FALSE
CD82	OK	negbinomial.size	5.00192e-53	1.93604e-52	CD82	3694	FALSE
AHR	OK	negbinomial.size	5.25984e-10	9.20472e-10	AHR	3702	FALSE
HAS2	OK	negbinomial.size	7.93542e-22	1.90566e-21	HAS2	228	FALSE
AXL	OK	negbinomial.size	5.5867e-10	9.72499e-10	AXL	145	FALSE
PDPN	OK	negbinomial.size	0.00132105	0.00172471	PDPN	167	FALSE
MET	OK	negbinomial.size	1.03979e-07	1.66064e-07	MET	4537	FALSE
ROS1	OK	negbinomial.size	0.0402182	0.0470882	ROS1	18	FALSE
C5AR1	OK	negbinomial.size	3.19841e-42	1.10186e-41	C5AR1	393	FALSE
NDRG2	OK	negbinomial.size	0.000116983	0.000161711	NDRG2	2919	FALSE
ESR1	OK	negbinomial.size	3.3503e-05	4.77164e-05	ESR1	30	FALSE
VTN	OK	negbinomial.size	0.646639	0.66691	VTN	23	FALSE
HRG	OK	negbinomial.size	0.110735	0.12392	HRG	11	FALSE
CBR1	OK	negbinomial.size	2.33657e-52	8.991e-52	CBR1	5486	FALSE
EPHA2	OK	negbinomial.size	2.82397e-54	1.11938e-53	EPHA2	5619	TRUE
ABCC3	OK	negbinomial.size	8.4169e-61	3.59631e-60	ABCC3	5950	TRUE
PGRMC1	OK	negbinomial.size	2.49363e-87	1.29197e-86	PGRMC1	7961	FALSE
CCL25	OK	negbinomial.size	1.66971e-18	3.73697e-18	CCL25	103	FALSE
ALDH1A1	OK	negbinomial.size	8.07342e-119	4.91881e-118	ALDH1A1	2798	FALSE
ALAD	OK	negbinomial.size	0.0630556	0.0726631	ALAD	1665	FALSE
HSP90AA1	OK	negbinomial.size	3.81897e-59	1.59043e-58	HSP90AA1	10927	TRUE
TGFA	OK	negbinomial.size	1.69532e-12	3.2334e-12	TGFA	1746	FALSE
SOX9	OK	negbinomial.size	2.66283e-05	3.81731e-05	SOX9	6712	FALSE
HS6ST2	OK	negbinomial.size	4.85509e-93	2.57633e-92	HS6ST2	769	FALSE
TXN	OK	negbinomial.size	0	0	TXN	10433	TRUE
PTPA	OK	negbinomial.size	3.46934e-65	1.57436e-64	PTPA	287	FALSE
MDM2	OK	negbinomial.size	2.02311e-10	3.60761e-10	MDM2	2976	FALSE
FBXW7	OK	negbinomial.size	0	0	FBXW7	3138	TRUE
TP63	OK	negbinomial.size	7.026e-13	1.36778e-12	TP63	11	FALSE
SP1	OK	negbinomial.size	4.37213e-06	6.47942e-06	SP1	2804	FALSE
CEBPA	OK	negbinomial.size	6.81404e-94	3.67512e-93	CEBPA	3691	FALSE
VDR	OK	negbinomial.size	2.80184e-20	6.53764e-20	VDR	3181	FALSE
HDAC3	OK	negbinomial.size	0.0335417	0.0396238	HDAC3	3225	FALSE
KRT17	OK	negbinomial.size	2.86522e-05	4.09852e-05	KRT17	951	FALSE
PTPN14	OK	negbinomial.size	9.98304e-19	2.2496e-18	PTPN14	820	FALSE
GLS2	OK	negbinomial.size	0.0767371	0.0879669	GLS2	287	FALSE
GLS	OK	negbinomial.size	4.74572e-51	1.80502e-50	GLS	5517	FALSE
ABCB1	OK	negbinomial.size	2.16801e-22	5.26403e-22	ABCB1	1676	FALSE
BSG	OK	negbinomial.size	7.24147e-188	6.35318e-187	BSG	9278	TRUE
CYB5R1	OK	negbinomial.size	1.88444e-07	2.98067e-07	CYB5R1	1904	FALSE
AGO2	OK	negbinomial.size	6.2334e-26	1.65386e-25	AGO2	5083	FALSE
EPCAM	OK	negbinomial.size	0	0	EPCAM	10412	TRUE
TYRO3	OK	negbinomial.size	0.321585	0.34463	TYRO3	767	FALSE
ATXN1	OK	negbinomial.size	0	0	ATXN1	2332	TRUE
RUNX1	OK	negbinomial.size	8.53649e-23	2.0959e-22	RUNX1	3705	FALSE
FZD2	OK	negbinomial.size	0.80379	0.818721	FZD2	47	FALSE
PRKCE	OK	negbinomial.size	2.7831e-202	2.57927e-201	PRKCE	1227	FALSE
LTBP1	OK	negbinomial.size	6.20492e-178	5.23441e-177	LTBP1	1250	FALSE
SPOP	OK	negbinomial.size	0.00589049	0.00745374	SPOP	4054	FALSE
MTA1	OK	negbinomial.size	3.6626e-10	6.46109e-10	MTA1	3528	FALSE
EFEMP1	OK	negbinomial.size	0.108479	0.122225	EFEMP1	196	FALSE
TGFBR2	OK	negbinomial.size	1.13614e-20	2.66994e-20	TGFBR2	3437	FALSE
KIT	OK	negbinomial.size	0.00613804	0.00770769	KIT	50	FALSE
THBD	OK	negbinomial.size	0.000433414	0.000580828	THBD	77	FALSE
FGFR1	OK	negbinomial.size	1.53549e-27	4.19233e-27	FGFR1	265	FALSE
KAT2B	OK	negbinomial.size	1.75981e-08	2.88767e-08	KAT2B	381	FALSE
TNS1	OK	negbinomial.size	1.64512e-12	3.14678e-12	TNS1	146	FALSE
FOXJ2	OK	negbinomial.size	0.00738115	0.00916377	FOXJ2	788	FALSE
ABCG2	OK	negbinomial.size	0.485213	0.506533	ABCG2	58	FALSE
BTRC	OK	negbinomial.size	3.26888e-16	6.87196e-16	BTRC	1018	FALSE
MMP11	OK	negbinomial.size	7.20496e-62	3.13965e-61	MMP11	1019	FALSE
F2RL2	OK	negbinomial.size	0.0185809	0.0225576	F2RL2	14	FALSE
MMP7	OK	negbinomial.size	0.0112055	0.0137817	MMP7	1922	TRUE
CTSZ	OK	negbinomial.size	8.15465e-13	1.57817e-12	CTSZ	6701	FALSE
ITGA6	OK	negbinomial.size	1.55055e-06	2.34005e-06	ITGA6	7832	FALSE
GLIPR2	OK	negbinomial.size	3.1245e-14	6.24899e-14	GLIPR2	437	FALSE
TNFSF11	OK	negbinomial.size	0.779277	0.796218	TNFSF11	25	FALSE
IRF6	OK	negbinomial.size	0.80604	0.819744	IRF6	4118	FALSE
RNH1	OK	negbinomial.size	1.38422e-21	3.30006e-21	RNH1	7152	FALSE
AGER	OK	negbinomial.size	0.0923565	0.105139	AGER	119	FALSE
ETV4	OK	negbinomial.size	1.09691e-33	3.3415e-33	ETV4	4927	FALSE
CYP7B1	OK	negbinomial.size	2.00533e-06	2.99889e-06	CYP7B1	21	FALSE
NR1I2	OK	negbinomial.size	4.54269e-11	8.25715e-11	NR1I2	1260	FALSE
BMP6	OK	negbinomial.size	1.41039e-06	2.13342e-06	BMP6	46	FALSE
SIAH1	OK	negbinomial.size	9.12971e-07	1.39059e-06	SIAH1	3411	FALSE
CTBP1	OK	negbinomial.size	1.40054e-18	3.14525e-18	CTBP1	5168	FALSE
ESR2	OK	negbinomial.size	1.97796e-09	3.38051e-09	ESR2	78	FALSE
CCR5	OK	negbinomial.size	0.0809426	0.0926264	CCR5	21	FALSE
IL11	OK	negbinomial.size	0.0397417	0.0466242	IL11	108	FALSE
HDAC9	OK	negbinomial.size	3.97368e-95	2.16089e-94	HDAC9	485	FALSE
APBB1	OK	negbinomial.size	0.00175044	0.0022673	APBB1	129	FALSE
CCL19	OK	negbinomial.size	2.8609e-07	4.47143e-07	CCL19	79	FALSE
CSK	OK	negbinomial.size	0.255325	0.275869	CSK	2674	FALSE
EIF5A	OK	negbinomial.size	1.08048e-263	1.24729e-262	EIF5A	9060	TRUE
MTOR	OK	negbinomial.size	0.0361604	0.0426407	MTOR	1432	FALSE
BRAF	OK	negbinomial.size	2.32142e-186	2.00986e-185	BRAF	1844	FALSE
POMC	OK	negbinomial.size	0.0222816	0.0267541	POMC	28	FALSE
IFT88	OK	negbinomial.size	1.96315e-07	3.09558e-07	IFT88	2616	FALSE
PEBP1	OK	negbinomial.size	2.73527e-57	1.11789e-56	PEBP1	8516	TRUE
TLE4	OK	negbinomial.size	5.83066e-25	1.51046e-24	TLE4	2714	FALSE
SIRT1	OK	negbinomial.size	1.03149e-38	3.36e-38	SIRT1	1686	FALSE
CFTR	OK	negbinomial.size	0	0	CFTR	3725	TRUE
SPRY2	OK	negbinomial.size	0.869985	0.877991	SPRY2	3724	FALSE
FGF9	OK	negbinomial.size	7.56231e-08	1.21663e-07	FGF9	130	FALSE
ETV1	OK	negbinomial.size	0.473428	0.495256	ETV1	290	FALSE
MMD	OK	negbinomial.size	0.375608	0.397988	MMD	1888	FALSE
KCNN4	OK	negbinomial.size	5.34889e-09	9.02454e-09	KCNN4	4356	FALSE
EPHB2	OK	negbinomial.size	4.54501e-77	2.21527e-76	EPHB2	4954	FALSE
ST6GAL1	OK	negbinomial.size	4.46812e-14	8.8289e-14	ST6GAL1	2565	FALSE
EPB41L3	OK	negbinomial.size	1.39731e-37	4.50702e-37	EPB41L3	328	FALSE
MYCN	OK	negbinomial.size	0.0380804	0.0448245	MYCN	127	FALSE
CAMK1D	OK	negbinomial.size	1.48772e-217	1.46108e-216	CAMK1D	1906	FALSE
PDCD1	OK	negbinomial.size	7.25084e-05	0.000101728	PDCD1	69	FALSE
PCSK1	OK	negbinomial.size	0.362387	0.385219	PCSK1	124	FALSE
FOXA2	OK	negbinomial.size	0.000336911	0.000454278	FOXA2	2969	FALSE
FOXO1	OK	negbinomial.size	1.37741e-172	1.14726e-171	FOXO1	1686	FALSE

## Sheet: TableS13
Table S13: Stage III Differential Genes
	status	family	pval	qval	gene_short_name	num_cells_expressed	use_for_ordering
JUNB	OK	negbinomial.size	3.69347e-30	9.35489e-30	JUNB	9142	TRUE
NFKBIA	OK	negbinomial.size	7.09655e-18	1.45479e-17	NFKBIA	8196	TRUE
TNFAIP3	OK	negbinomial.size	2.35013e-73	9.51656e-73	TNFAIP3	3465	FALSE
PTGS2	OK	negbinomial.size	9.02606e-107	4.62586e-106	PTGS2	1744	FALSE
CXCL1	OK	negbinomial.size	0	0	CXCL1	6073	TRUE
CCL20	OK	negbinomial.size	3.61801e-23	8.32777e-23	CCL20	4125	TRUE
HBEGF	OK	negbinomial.size	6.85029e-95	3.25637e-94	HBEGF	5328	TRUE
KLF6	OK	negbinomial.size	5.33133e-239	6.72568e-238	KLF6	8601	TRUE
PLAUR	OK	negbinomial.size	2.21399e-115	1.21032e-114	PLAUR	6803	TRUE
ZFP36	OK	negbinomial.size	0.000136854	0.000191013	ZFP36	8192	TRUE
JUN	OK	negbinomial.size	0	0	JUN	9403	TRUE
IL1B	OK	negbinomial.size	3.95703e-23	9.07628e-23	IL1B	1477	FALSE
SOD2	OK	negbinomial.size	4.16498e-06	6.3246e-06	SOD2	6998	FALSE
ETS2	OK	negbinomial.size	4.4841e-29	1.12704e-28	ETS2	7270	FALSE
F3	OK	negbinomial.size	0.103856	0.117262	F3	4243	TRUE
SDC4	OK	negbinomial.size	2.34073e-31	6.06924e-31	SDC4	6147	TRUE
EGR1	OK	negbinomial.size	1.72408e-28	4.28407e-28	EGR1	6091	TRUE
IL6	OK	negbinomial.size	0.000174751	0.000240329	IL6	277	FALSE
TNF	OK	negbinomial.size	1.3819e-19	2.9362e-19	TNF	516	FALSE
KDM6B	OK	negbinomial.size	3.7941e-12	6.99138e-12	KDM6B	4275	FALSE
NFKB1	OK	negbinomial.size	1.57926e-89	7.24473e-89	NFKB1	3349	FALSE
LIF	OK	negbinomial.size	7.89546e-16	1.56478e-15	LIF	2773	FALSE
PTX3	OK	negbinomial.size	0.118123	0.132459	PTX3	32	FALSE
FOSL1	OK	negbinomial.size	1.17785e-73	4.79919e-73	FOSL1	4054	FALSE
NR4A1	OK	negbinomial.size	0.0106684	0.0131797	NR4A1	7458	TRUE
JAG1	OK	negbinomial.size	5.10906e-80	2.10789e-79	JAG1	3406	FALSE
CCL2	OK	negbinomial.size	0.000904955	0.00119929	CCL2	520	FALSE
EHD1	OK	negbinomial.size	2.50387e-12	4.63994e-12	EHD1	3664	FALSE
PHLDA1	OK	negbinomial.size	0	0	PHLDA1	6060	TRUE
GEM	OK	negbinomial.size	0.00217685	0.00282217	GEM	3185	FALSE
GADD45A	OK	negbinomial.size	3.12691e-161	2.50153e-160	GADD45A	5934	TRUE
BHLHE40	OK	negbinomial.size	4.84565e-247	6.35749e-246	BHLHE40	5596	FALSE
SOCS3	OK	negbinomial.size	0.286188	0.30929	SOCS3	2223	FALSE
NFIL3	OK	negbinomial.size	1.6831e-06	2.58575e-06	NFIL3	1677	FALSE
SERPINE1	OK	negbinomial.size	8.49041e-179	7.73571e-178	SERPINE1	658	FALSE
RELA	OK	negbinomial.size	0.0613747	0.070511	RELA	3458	FALSE
BIRC2	OK	negbinomial.size	8.67692e-09	1.44103e-08	BIRC2	3136	FALSE
CXCL6	OK	negbinomial.size	0.218408	0.239591	CXCL6	272	FALSE
CD44	OK	negbinomial.size	0.113898	0.128159	CD44	7451	FALSE
INHBA	OK	negbinomial.size	4.61237e-15	8.97838e-15	INHBA	246	FALSE
MYC	OK	negbinomial.size	1.65047e-69	6.40654e-69	MYC	6254	FALSE
NAMPT	OK	negbinomial.size	1.53382e-119	8.8262e-119	NAMPT	5840	FALSE
ID2	OK	negbinomial.size	5.7484e-38	1.61843e-37	ID2	6351	TRUE
PHLDA2	OK	negbinomial.size	0	0	PHLDA2	8790	TRUE
CCL5	OK	negbinomial.size	1.63817e-41	4.90702e-41	CCL5	758	FALSE
SQSTM1	OK	negbinomial.size	1.31513e-128	8.21643e-128	SQSTM1	9554	TRUE
GADD45B	OK	negbinomial.size	1.1829e-84	5.17323e-84	GADD45B	4604	TRUE
MCL1	OK	negbinomial.size	2.11821e-171	1.85273e-170	MCL1	7874	TRUE
VEGFA	OK	negbinomial.size	1.75942e-161	1.42492e-160	VEGFA	6004	FALSE
CDKN1A	OK	negbinomial.size	3.45119e-07	5.37762e-07	CDKN1A	6173	FALSE
CCN1	OK	negbinomial.size	2.01185e-112	1.07299e-111	CCN1	283	FALSE
IL18	OK	negbinomial.size	0.000125936	0.00017615	IL18	4443	FALSE
RHOB	OK	negbinomial.size	0	0	RHOB	7543	TRUE
AREG	OK	negbinomial.size	0	0	AREG	7770	TRUE
KLF4	OK	negbinomial.size	0	0	KLF4	6633	TRUE
SAT1	OK	negbinomial.size	3.77857e-54	1.2777e-53	SAT1	10402	FALSE
PMEPA1	OK	negbinomial.size	1.10432e-14	2.14329e-14	PMEPA1	5931	TRUE
CEBPB	OK	negbinomial.size	7.99763e-36	2.19371e-35	CEBPB	6297	FALSE
CSF2	OK	negbinomial.size	0.310486	0.332809	CSF2	153	FALSE
STAT5A	OK	negbinomial.size	1.94165e-14	3.73525e-14	STAT5A	1229	FALSE
CCND1	OK	negbinomial.size	1.90431e-142	1.26184e-141	CCND1	6684	TRUE
SPHK1	OK	negbinomial.size	0.135698	0.150878	SPHK1	812	FALSE
FUT4	OK	negbinomial.size	0.0148162	0.0180323	FUT4	2431	FALSE
HES1	OK	negbinomial.size	3.48006e-181	3.21538e-180	HES1	7079	TRUE
BCL6	OK	negbinomial.size	2.30533e-45	7.23588e-45	BCL6	1004	FALSE
IRS2	OK	negbinomial.size	5.31322e-34	1.42847e-33	IRS2	4817	TRUE
IL23A	OK	negbinomial.size	0.0162211	0.0196692	IL23A	763	FALSE
SMAD3	OK	negbinomial.size	0	0	SMAD3	2842	TRUE
EDN1	OK	negbinomial.size	0	0	EDN1	4834	TRUE
BMP2	OK	negbinomial.size	1.73855e-08	2.87276e-08	BMP2	1718	FALSE
TNC	OK	negbinomial.size	5.78831e-08	9.32956e-08	TNC	175	FALSE
ENO2	OK	negbinomial.size	0.0128944	0.0157812	ENO2	1211	FALSE
NDRG1	OK	negbinomial.size	2.80341e-251	3.75313e-250	NDRG1	5955	TRUE
HK2	OK	negbinomial.size	1.33859e-80	5.5931e-80	HK2	3272	FALSE
GPI	OK	negbinomial.size	0.872816	0.880873	GPI	6938	FALSE
SLC2A1	OK	negbinomial.size	3.96372e-21	8.81425e-21	SLC2A1	5631	FALSE
ADM	OK	negbinomial.size	0.0119267	0.0146516	ADM	4128	FALSE
ENO1	OK	negbinomial.size	3.12198e-83	1.33857e-82	ENO1	10228	FALSE
KDM3A	OK	negbinomial.size	2.1104e-121	1.23609e-120	KDM3A	2236	FALSE
CCNG2	OK	negbinomial.size	0.0967917	0.109475	CCNG2	2138	FALSE
GAPDH	OK	negbinomial.size	0	0	GAPDH	13313	TRUE
ANGPTL4	OK	negbinomial.size	5.28016e-122	3.1489e-121	ANGPTL4	1996	FALSE
LOX	OK	negbinomial.size	0.0642059	0.0735063	LOX	68	FALSE
IGFBP3	OK	negbinomial.size	0.000174685	0.000240329	IGFBP3	421	FALSE
ALDOB	OK	negbinomial.size	0.0206658	0.0247386	ALDOB	1281	FALSE
STC2	OK	negbinomial.size	1.62029e-09	2.768e-09	STC2	899	FALSE
ERRFI1	OK	negbinomial.size	0.660932	0.683866	ERRFI1	5830	TRUE
HMOX1	OK	negbinomial.size	7.75816e-27	1.87799e-26	HMOX1	1127	FALSE
PGF	OK	negbinomial.size	0.00020337	0.000278519	PGF	784	FALSE
CAV1	OK	negbinomial.size	0.00165032	0.00214379	CAV1	995	FALSE
GPC3	OK	negbinomial.size	0.858894	0.868157	GPC3	260	FALSE
S100A4	OK	negbinomial.size	0	0	S100A4	8055	TRUE
EGFR	OK	negbinomial.size	1.25506e-59	4.499e-59	EGFR	3123	FALSE
CAVIN1	OK	negbinomial.size	1.51014e-26	3.62876e-26	CAVIN1	109	FALSE
BGN	OK	negbinomial.size	1.45099e-19	3.07049e-19	BGN	670	FALSE
CDKN1B	OK	negbinomial.size	6.63414e-08	1.06667e-07	CDKN1B	2793	FALSE
ANXA2	OK	negbinomial.size	5.83929e-215	6.3843e-214	ANXA2	10008	TRUE
PRKCA	OK	negbinomial.size	0	0	PRKCA	3703	TRUE
CXCR4	OK	negbinomial.size	1.22398e-45	3.8789e-45	CXCR4	2094	TRUE
CCN2	OK	negbinomial.size	6.38582e-88	2.88903e-87	CCN2	238	FALSE
PPARGC1A	OK	negbinomial.size	8.97645e-05	0.000126908	PPARGC1A	568	FALSE
BCL2	OK	negbinomial.size	6.19639e-43	1.8732e-42	BCL2	613	FALSE
SDC2	OK	negbinomial.size	0.000348952	0.00047591	SDC2	209	FALSE
VHL	OK	negbinomial.size	3.06511e-05	4.43866e-05	VHL	1798	FALSE
FOXO3	OK	negbinomial.size	5.48615e-229	6.42663e-228	FOXO3	4625	FALSE
PDGFB	OK	negbinomial.size	0.115348	0.129569	PDGFB	186	FALSE
GLRX	OK	negbinomial.size	8.63141e-122	5.10109e-121	GLRX	5278	FALSE
TGFBI	OK	negbinomial.size	0	0	TGFBI	5720	TRUE
DCN	OK	negbinomial.size	1.00561e-34	2.72594e-34	DCN	917	TRUE
SIAH2	OK	negbinomial.size	2.6891e-09	4.53483e-09	SIAH2	3798	FALSE
PLAC8	OK	negbinomial.size	3.66685e-145	2.55899e-144	PLAC8	5757	TRUE
FBP1	OK	negbinomial.size	6.93113e-56	2.39306e-55	FBP1	3578	FALSE
HSPA5	OK	negbinomial.size	1.35664e-32	3.54563e-32	HSPA5	7817	TRUE
NEDD4L	OK	negbinomial.size	2.87778e-165	2.35978e-164	NEDD4L	3847	FALSE
TPBG	OK	negbinomial.size	0.556146	0.582799	TPBG	1123	FALSE
COL5A1	OK	negbinomial.size	5.12655e-22	1.15568e-21	COL5A1	280	FALSE
GPC1	OK	negbinomial.size	8.17516e-06	1.22721e-05	GPC1	1635	FALSE
TGM2	OK	negbinomial.size	2.76302e-10	4.78243e-10	TGM2	1390	FALSE
ETS1	OK	negbinomial.size	1.20634e-36	3.36749e-36	ETS1	1304	FALSE
HOXB9	OK	negbinomial.size	0.613852	0.638173	HOXB9	3854	FALSE
TGFB3	OK	negbinomial.size	0.00270338	0.00347048	TGFB3	163	FALSE
FASN	OK	negbinomial.size	3.39642e-32	8.84148e-32	FASN	4316	FALSE
LGALS3	OK	negbinomial.size	2.33515e-97	1.13471e-96	LGALS3	11443	FALSE
ANXA5	OK	negbinomial.size	3.07064e-20	6.64799e-20	ANXA5	5160	FALSE
TP53INP1	OK	negbinomial.size	2.63042e-33	6.92995e-33	TP53INP1	1179	FALSE
CLU	OK	negbinomial.size	3.61272e-52	1.19093e-51	CLU	1484	FALSE
CXCL16	OK	negbinomial.size	8.28939e-143	5.60602e-142	CXCL16	4947	FALSE
TNFRSF12A	OK	negbinomial.size	0	0	TNFRSF12A	6736	TRUE
PPARG	OK	negbinomial.size	0	0	PPARG	4237	TRUE
CTNNB1	OK	negbinomial.size	5.21749e-07	8.1106e-07	CTNNB1	6995	FALSE
ARHGEF2	OK	negbinomial.size	5.22224e-118	2.95327e-117	ARHGEF2	2787	FALSE
KIF5B	OK	negbinomial.size	4.09829e-52	1.34424e-51	KIF5B	7969	FALSE
BIRC5	OK	negbinomial.size	3.08388e-07	4.82823e-07	BIRC5	2777	FALSE
NF1	OK	negbinomial.size	5.34444e-241	6.87442e-240	NF1	3747	FALSE
TSC1	OK	negbinomial.size	5.31927e-28	1.31677e-27	TSC1	1668	FALSE
RASA1	OK	negbinomial.size	1.7413e-160	1.37626e-159	RASA1	2503	FALSE
SMC3	OK	negbinomial.size	5.71718e-11	1.00819e-10	SMC3	4420	FALSE
GSN	OK	negbinomial.size	7.34759e-88	3.30138e-87	GSN	6289	TRUE
LATS1	OK	negbinomial.size	2.8825e-22	6.54298e-22	LATS1	1632	FALSE
TIAM1	OK	negbinomial.size	7.10133e-11	1.24892e-10	TIAM1	203	FALSE
FLNA	OK	negbinomial.size	0.0113351	0.0139771	FLNA	3571	FALSE
ARHGEF12	OK	negbinomial.size	2.93677e-146	2.07153e-145	ARHGEF12	4071	FALSE
EZR	OK	negbinomial.size	7.62472e-27	1.85253e-26	EZR	9047	FALSE
ECT2	OK	negbinomial.size	8.82378e-31	2.25229e-30	ECT2	3279	FALSE
AURKA	OK	negbinomial.size	2.61665e-05	3.8145e-05	AURKA	1670	FALSE
HDAC6	OK	negbinomial.size	4.57713e-21	1.01098e-20	HDAC6	1318	FALSE
DST	OK	negbinomial.size	4.32655e-98	2.134e-97	DST	5772	FALSE
RASAL2	OK	negbinomial.size	0	0	RASAL2	2452	FALSE
SMC1A	OK	negbinomial.size	0.00869912	0.0107672	SMC1A	3785	FALSE
ACTN4	OK	negbinomial.size	3.49681e-186	3.3245e-185	ACTN4	8647	TRUE
CDC42	OK	negbinomial.size	1.38532e-53	4.66036e-53	CDC42	8273	FALSE
LMNB1	OK	negbinomial.size	1.70386e-13	3.22112e-13	LMNB1	2168	FALSE
ROCK1	OK	negbinomial.size	3.96824e-59	1.41476e-58	ROCK1	4578	FALSE
FSCN1	OK	negbinomial.size	2.38391e-56	8.27432e-56	FSCN1	3342	FALSE
NOTCH2	OK	negbinomial.size	4.61932e-16	9.23863e-16	NOTCH2	1681	FALSE
JAG2	OK	negbinomial.size	3.09835e-26	7.41795e-26	JAG2	1706	FALSE
NOTCH1	OK	negbinomial.size	2.13296e-43	6.50801e-43	NOTCH1	2708	FALSE
AXIN2	OK	negbinomial.size	7.27847e-98	3.56319e-97	AXIN2	2545	FALSE
NOTCH4	OK	negbinomial.size	0.687301	0.707802	NOTCH4	319	FALSE
LEF1	OK	negbinomial.size	0.00477639	0.00603721	LEF1	312	FALSE
AXIN1	OK	negbinomial.size	5.45655e-27	1.33563e-26	AXIN1	2853	FALSE
WNT5B	OK	negbinomial.size	3.69215e-06	5.6196e-06	WNT5B	273	FALSE
WNT6	OK	negbinomial.size	0.0527925	0.0609717	WNT6	121	FALSE
HDAC2	OK	negbinomial.size	2.00015e-38	5.70476e-38	HDAC2	6635	FALSE
DKK1	OK	negbinomial.size	0.00067488	0.000898015	DKK1	57	FALSE
TCF7	OK	negbinomial.size	0.000536592	0.000718376	TCF7	2412	FALSE
NUMB	OK	negbinomial.size	6.77327e-222	7.53096e-221	NUMB	3570	FALSE
ADAM17	OK	negbinomial.size	2.41634e-126	1.4677e-125	ADAM17	3049	FALSE
DVL2	OK	negbinomial.size	5.37876e-08	8.6908e-08	DVL2	1567	FALSE
NCSTN	OK	negbinomial.size	0.441556	0.464945	NCSTN	2851	FALSE
HDAC5	OK	negbinomial.size	0.0572408	0.0659929	HDAC5	2173	FALSE
CCND2	OK	negbinomial.size	1.45075e-94	6.84669e-94	CCND2	4919	FALSE
FRAT1	OK	negbinomial.size	0.00144219	0.00187714	FRAT1	396	FALSE
FZD8	OK	negbinomial.size	0.000117525	0.000165089	FZD8	65	FALSE
TP53	OK	negbinomial.size	0.0180074	0.0217949	TP53	4120	FALSE
SKP2	OK	negbinomial.size	0.604857	0.62982	SKP2	1341	FALSE
TGFBR1	OK	negbinomial.size	4.45409e-09	7.45379e-09	TGFBR1	1744	FALSE
SMAD7	OK	negbinomial.size	3.42697e-54	1.16482e-53	SMAD7	1630	FALSE
TGFB1	OK	negbinomial.size	0.145984	0.161766	TGFB1	1771	FALSE
SMURF2	OK	negbinomial.size	1.56459e-118	8.92495e-118	SMURF2	2275	FALSE
SKIL	OK	negbinomial.size	0.303203	0.326068	SKIL	3848	FALSE
SKI	OK	negbinomial.size	1.95255e-41	5.82215e-41	SKI	2075	FALSE
ACVR1	OK	negbinomial.size	1.89143e-13	3.56545e-13	ACVR1	1384	FALSE
FURIN	OK	negbinomial.size	2.21407e-05	3.24929e-05	FURIN	2482	FALSE
MAP3K7	OK	negbinomial.size	3.77169e-13	7.06923e-13	MAP3K7	2122	FALSE
HIPK2	OK	negbinomial.size	3.38917e-12	6.26281e-12	HIPK2	2857	FALSE
ENG	OK	negbinomial.size	0.000147532	0.00020548	ENG	548	FALSE
CDH1	OK	negbinomial.size	6.9099e-08	1.10829e-07	CDH1	6870	TRUE
ID1	OK	negbinomial.size	5.0247e-90	2.33773e-89	ID1	5634	TRUE
TRIM33	OK	negbinomial.size	5.85235e-64	2.18133e-63	TRIM33	3772	FALSE
TJP1	OK	negbinomial.size	8.47144e-61	3.08737e-60	TJP1	4108	FALSE
WWTR1	OK	negbinomial.size	0.136915	0.151974	WWTR1	1154	FALSE
THBS1	OK	negbinomial.size	5.46138e-61	2.01273e-60	THBS1	1341	FALSE
HDAC1	OK	negbinomial.size	0.00366128	0.00465465	HDAC1	6437	FALSE
RHOA	OK	negbinomial.size	0.0037077	0.00470455	RHOA	9325	FALSE
STAT1	OK	negbinomial.size	6.81696e-19	1.42418e-18	STAT1	3956	FALSE
STAT3	OK	negbinomial.size	5.51691e-133	3.54813e-132	STAT3	5550	FALSE
MYD88	OK	negbinomial.size	3.75851e-09	6.30584e-09	MYD88	2341	FALSE
ITGB3	OK	negbinomial.size	1	1	ITGB3	13	FALSE
CD14	OK	negbinomial.size	8.75393e-11	1.52728e-10	CD14	446	FALSE
CXCL13	OK	negbinomial.size	1.09638e-15	2.16634e-15	CXCL13	306	FALSE
FAS	OK	negbinomial.size	9.67638e-13	1.80846e-12	FAS	1311	FALSE
PTPN11	OK	negbinomial.size	7.4829e-20	1.60944e-19	PTPN11	3802	FALSE
CXCL9	OK	negbinomial.size	4.68021e-12	8.55213e-12	CXCL9	101	FALSE
CD36	OK	negbinomial.size	0.32992	0.352488	CD36	59	FALSE
NME1	OK	negbinomial.size	1.57659e-142	1.05535e-141	NME1	7268	FALSE
BRF2	OK	negbinomial.size	0.63136	0.6543	BRF2	1191	FALSE
TYMS	OK	negbinomial.size	0.00852582	0.0105927	TYMS	3032	FALSE
CCNA2	OK	negbinomial.size	0.000123834	0.000173579	CCNA2	1346	FALSE
CKS2	OK	negbinomial.size	1.19099e-52	3.94592e-52	CKS2	7549	FALSE
HMGB3	OK	negbinomial.size	6.13913e-31	1.57315e-30	HMGB3	4974	FALSE
TACC3	OK	negbinomial.size	3.79829e-72	1.50101e-71	TACC3	1770	FALSE
EZH2	OK	negbinomial.size	7.70387e-78	3.15858e-77	EZH2	3039	FALSE
E2F1	OK	negbinomial.size	0.133053	0.148188	E2F1	1017	FALSE
KMT5A	OK	negbinomial.size	4.94405e-18	1.01671e-17	KMT5A	2372	FALSE
MYBL2	OK	negbinomial.size	0.000531937	0.0007136	MYBL2	1863	FALSE
CUL3	OK	negbinomial.size	1.34052e-72	5.36209e-72	CUL3	4681	FALSE
MAPK14	OK	negbinomial.size	7.51712e-60	2.70947e-59	MAPK14	3338	FALSE
CUL4A	OK	negbinomial.size	5.10666e-19	1.07028e-18	CUL4A	4821	FALSE
FOXN3	OK	negbinomial.size	1.85043e-132	1.17853e-131	FOXN3	2749	FALSE
HIF1A	OK	negbinomial.size	5.03952e-112	2.64474e-111	HIF1A	3838	FALSE
NCL	OK	negbinomial.size	1.75817e-17	3.58187e-17	NCL	9143	FALSE
EGF	OK	negbinomial.size	4.01014e-112	2.12149e-111	EGF	576	FALSE
G3BP1	OK	negbinomial.size	1.45857e-15	2.86473e-15	G3BP1	5794	FALSE
TNFSF10	OK	negbinomial.size	0.390518	0.413861	TNFSF10	3322	FALSE
F2R	OK	negbinomial.size	7.4183e-08	1.18693e-07	F2R	567	FALSE
SATB1	OK	negbinomial.size	0.0182915	0.0220574	SATB1	1192	FALSE
CREBBP	OK	negbinomial.size	1.45015e-60	5.25581e-60	CREBBP	3425	FALSE
PDGFRB	OK	negbinomial.size	4.57307e-17	9.23057e-17	PDGFRB	137	FALSE
TIMP1	OK	negbinomial.size	0	0	TIMP1	8163	FALSE
HSPB1	OK	negbinomial.size	1.92558e-190	1.85762e-189	HSPB1	9788	TRUE
TIMP2	OK	negbinomial.size	0.191536	0.210465	TIMP2	2040	FALSE
TIMP3	OK	negbinomial.size	1.56223e-20	3.41607e-20	TIMP3	1148	FALSE
HGF	OK	negbinomial.size	0.00328309	0.0041901	HGF	12	FALSE
LUM	OK	negbinomial.size	1.05712e-27	2.59727e-27	LUM	1239	TRUE
LMNA	OK	negbinomial.size	6.82997e-89	3.11143e-88	LMNA	9050	TRUE
PTK2	OK	negbinomial.size	0	0	PTK2	4247	TRUE
MMP2	OK	negbinomial.size	1.84682e-07	2.92636e-07	MMP2	489	FALSE
BRCA1	OK	negbinomial.size	1.44887e-80	6.01557e-80	BRCA1	1261	FALSE
KRT18	OK	negbinomial.size	3.27471522262969e-316	4.99584461870948e-315	KRT18	11748	TRUE
TGFB2	OK	negbinomial.size	0.000417401	0.000565734	TGFB2	91	FALSE
TGFBR3	OK	negbinomial.size	5.43956e-29	1.36197e-28	TGFBR3	1094	FALSE
TXNIP	OK	negbinomial.size	3.40233e-07	5.31411e-07	TXNIP	5488	FALSE
BCL2L1	OK	negbinomial.size	0.275595	0.298827	BCL2L1	4965	FALSE
ANXA1	OK	negbinomial.size	5.76195e-154	4.34464e-153	ANXA1	6129	TRUE
PDCD4	OK	negbinomial.size	1.81916e-14	3.50991e-14	PDCD4	4514	FALSE
ERBB2	OK	negbinomial.size	1.16211e-08	1.92511e-08	ERBB2	4252	FALSE
PAK1	OK	negbinomial.size	6.70098e-62	2.48353e-61	PAK1	4197	FALSE
NOTCH3	OK	negbinomial.size	0.000633844	0.000845125	NOTCH3	563	FALSE
FZD7	OK	negbinomial.size	0.0793517	0.0902162	FZD7	609	FALSE
WNT5A	OK	negbinomial.size	0.0460362	0.0533564	WNT5A	53	FALSE
SKP1	OK	negbinomial.size	1.14954e-72	4.62637e-72	SKP1	9481	TRUE
ARRB1	OK	negbinomial.size	1.43791e-68	5.51618e-68	ARRB1	1825	FALSE
IDH1	OK	negbinomial.size	8.15612e-20	1.7485e-19	IDH1	5112	FALSE
YWHAG	OK	negbinomial.size	0.820361	0.83306	YWHAG	6173	FALSE
ESRRA	OK	negbinomial.size	1.67571e-35	4.56126e-35	ESRRA	4872	FALSE
CD151	OK	negbinomial.size	8.0833e-136	5.25014e-135	CD151	7709	FALSE
COL4A1	OK	negbinomial.size	1.28552e-25	3.06654e-25	COL4A1	504	FALSE
MYLK	OK	negbinomial.size	4.23626e-15	8.2708e-15	MYLK	381	FALSE
MGLL	OK	negbinomial.size	0.00745826	0.00930155	MGLL	5465	FALSE
UCP2	OK	negbinomial.size	4.21737e-06	6.38937e-06	UCP2	2097	FALSE
SLC9A3R1	OK	negbinomial.size	1.15399e-45	3.67484e-45	SLC9A3R1	5089	FALSE
MYB	OK	negbinomial.size	5.49145e-05	7.81429e-05	MYB	2638	FALSE
IGFBP4	OK	negbinomial.size	0.00441319	0.0055889	IGFBP4	4909	FALSE
KRT19	OK	negbinomial.size	0	0	KRT19	10395	TRUE
LRIG1	OK	negbinomial.size	7.35202e-61	2.69437e-60	LRIG1	1407	FALSE
KDM4B	OK	negbinomial.size	2.78732e-176	2.47092e-175	KDM4B	2564	FALSE
XBP1	OK	negbinomial.size	0.358597	0.381883	XBP1	7186	FALSE
FHL2	OK	negbinomial.size	3.16082e-69	1.2197e-68	FHL2	7442	TRUE
OVOL2	OK	negbinomial.size	0.0631655	0.0724415	OVOL2	1674	FALSE
MUC1	OK	negbinomial.size	1.70536e-23	3.93915e-23	MUC1	5748	FALSE
CXCL12	OK	negbinomial.size	0.0035733	0.00455162	CXCL12	257	FALSE
GJA1	OK	negbinomial.size	1.23656e-05	1.83111e-05	GJA1	71	FALSE
AQP3	OK	negbinomial.size	0	0	AQP3	2938	TRUE
FOXC1	OK	negbinomial.size	0.342367	0.365191	FOXC1	743	FALSE
CLDN7	OK	negbinomial.size	2.3834e-33	6.30446e-33	CLDN7	8538	TRUE
JAK2	OK	negbinomial.size	2.17089e-143	1.48344e-142	JAK2	1218	FALSE
P2RY2	OK	negbinomial.size	4.28436e-14	8.194e-14	P2RY2	472	FALSE
KRT8	OK	negbinomial.size	0	0	KRT8	11703	TRUE
ESRP2	OK	negbinomial.size	3.18932e-11	5.6699e-11	ESRP2	1643	FALSE
IGF1R	OK	negbinomial.size	3.26381e-195	3.24403e-194	IGF1R	3000	FALSE
AR	OK	negbinomial.size	0.527316	0.554358	AR	12	FALSE
SLC39A6	OK	negbinomial.size	5.56153e-45	1.72908e-44	SLC39A6	3098	FALSE
GAB2	OK	negbinomial.size	1.10418e-126	6.76954e-126	GAB2	1399	FALSE
FKBP5	OK	negbinomial.size	2.38217e-58	8.40165e-58	FKBP5	1653	FALSE
AGR2	OK	negbinomial.size	0	0	AGR2	9657	TRUE
PKP3	OK	negbinomial.size	1.06609e-20	2.34682e-20	PKP3	7076	FALSE
S100A9	OK	negbinomial.size	1.04579e-290	1.55917e-289	S100A9	1817	TRUE
MEST	OK	negbinomial.size	2.47873e-81	1.04906e-80	MEST	3804	FALSE
CXCL14	OK	negbinomial.size	2.82123e-11	5.02915e-11	CXCL14	1156	TRUE
SCUBE2	OK	negbinomial.size	0.149776	0.165688	SCUBE2	35	FALSE
LAMC2	OK	negbinomial.size	3.94334e-53	1.31981e-52	LAMC2	4146	TRUE
TFPI2	OK	negbinomial.size	0.912369	0.917966	TFPI2	46	FALSE
IDH2	OK	negbinomial.size	2.5404e-84	1.10364e-83	IDH2	7240	FALSE
MDK	OK	negbinomial.size	0	0	MDK	6841	TRUE
ST14	OK	negbinomial.size	6.83022e-20	1.47389e-19	ST14	7196	FALSE
PTPN6	OK	negbinomial.size	1.1618e-24	2.72192e-24	PTPN6	2199	FALSE
INPP4B	OK	negbinomial.size	2.02543e-233	2.46052e-232	INPP4B	1932	FALSE
ITGAV	OK	negbinomial.size	4.32022e-21	9.57455e-21	ITGAV	2942	FALSE
SPDEF	OK	negbinomial.size	7.30439e-06	1.10153e-05	SPDEF	1406	FALSE
HPGD	OK	negbinomial.size	0.242948	0.265181	HPGD	2560	FALSE
SRF	OK	negbinomial.size	1.7541e-19	3.69997e-19	SRF	3112	FALSE
AKT1	OK	negbinomial.size	0.0504895	0.0584147	AKT1	3734	FALSE
CRYAB	OK	negbinomial.size	5.04796e-16	1.00652e-15	CRYAB	503	FALSE
ADAM12	OK	negbinomial.size	4.19e-12	7.69927e-12	ADAM12	104	FALSE
TPM2	OK	negbinomial.size	0.00865539	0.0107333	TPM2	3259	FALSE
FHL1	OK	negbinomial.size	9.82814e-06	1.46862e-05	FHL1	213	FALSE
ITGB5	OK	negbinomial.size	0.000451876	0.000609939	ITGB5	3098	FALSE
COL3A1	OK	negbinomial.size	2.51141e-110	1.30753e-109	COL3A1	1616	TRUE
IGFBP7	OK	negbinomial.size	1.47604e-158	1.12591e-157	IGFBP7	2318	TRUE
MEF2D	OK	negbinomial.size	5.25146e-23	1.19617e-22	MEF2D	2851	FALSE
HSPB2	OK	negbinomial.size	0.0340565	0.0399661	HSPB2	41	FALSE
COL4A2	OK	negbinomial.size	9.5937e-28	2.36597e-27	COL4A2	1037	FALSE
SGCD	OK	negbinomial.size	0.000930365	0.00122882	SGCD	36	FALSE
FGF2	OK	negbinomial.size	2.27044e-17	4.61117e-17	FGF2	405	FALSE
KLF5	OK	negbinomial.size	4.92856e-85	2.16989e-84	KLF5	7649	TRUE
TAGLN	OK	negbinomial.size	1.34607e-55	4.62315e-55	TAGLN	1417	TRUE
AKT2	OK	negbinomial.size	1.78672e-09	3.04439e-09	AKT2	3129	FALSE
LAMA2	OK	negbinomial.size	8.9936e-29	2.24327e-28	LAMA2	290	FALSE
COL6A3	OK	negbinomial.size	2.61136e-36	7.22806e-36	COL6A3	487	FALSE
IGF1	OK	negbinomial.size	0.000829834	0.00110197	IGF1	72	FALSE
FST	OK	negbinomial.size	0.0138962	0.0169756	FST	20	FALSE
PTP4A3	OK	negbinomial.size	0.0428106	0.0497057	PTP4A3	1530	FALSE
ITGB1	OK	negbinomial.size	0.0383639	0.0447806	ITGB1	7201	FALSE
COL1A1	OK	negbinomial.size	1.09057e-139	7.15413e-139	COL1A1	1923	TRUE
CDH13	OK	negbinomial.size	1.4605e-20	3.20431e-20	CDH13	267	FALSE
SLC6A8	OK	negbinomial.size	2.90783e-51	9.49024e-51	SLC6A8	3910	FALSE
RB1	OK	negbinomial.size	2.67356e-40	7.79492e-40	RB1	2985	FALSE
TSC2	OK	negbinomial.size	4.20434e-38	1.18881e-37	TSC2	2687	FALSE
EPHB3	OK	negbinomial.size	0.0180929	0.0218581	EPHB3	2592	FALSE
ITGB4	OK	negbinomial.size	2.51804e-195	2.54128e-194	ITGB4	6268	FALSE
FOXO4	OK	negbinomial.size	3.15427e-05	4.5477e-05	FOXO4	831	FALSE
COL6A2	OK	negbinomial.size	5.39719e-43	1.63915e-42	COL6A2	603	FALSE
SPARC	OK	negbinomial.size	4.58922e-45	1.43359e-44	SPARC	1532	TRUE
RAB22A	OK	negbinomial.size	0.0194887	0.023415	RAB22A	4530	FALSE
ADAM10	OK	negbinomial.size	2.65895e-213	2.85946e-212	ADAM10	3683	FALSE
MAPK1	OK	negbinomial.size	3.2489e-31	8.35796e-31	MAPK1	3772	FALSE
CD63	OK	negbinomial.size	0	0	CD63	9350	TRUE
ISG15	OK	negbinomial.size	4.25249e-282	6.06442e-281	ISG15	7040	TRUE
NMI	OK	negbinomial.size	0.122923	0.137373	NMI	3050	FALSE
IL15	OK	negbinomial.size	7.68335e-11	1.34407e-10	IL15	963	FALSE
BATF2	OK	negbinomial.size	4.78895e-12	8.72653e-12	BATF2	965	FALSE
IRF8	OK	negbinomial.size	7.7783e-06	1.17031e-05	IRF8	3067	FALSE
PLA2G4A	OK	negbinomial.size	4.53102e-39	1.30366e-38	PLA2G4A	669	FALSE
VCAM1	OK	negbinomial.size	2.37228e-08	3.91009e-08	VCAM1	86	FALSE
CD274	OK	negbinomial.size	1.03482e-18	2.14823e-18	CD274	245	FALSE
MTHFD2	OK	negbinomial.size	3.59192e-09	6.04179e-09	MTHFD2	5213	FALSE
NCOA3	OK	negbinomial.size	3.64939e-160	2.85e-159	NCOA3	2738	FALSE
SRI	OK	negbinomial.size	2.88674e-149	2.10411e-148	SRI	8633	FALSE
CTNND1	OK	negbinomial.size	2.92564e-178	2.62907e-177	CTNND1	6381	FALSE
LIMA1	OK	negbinomial.size	0	0	LIMA1	5952	TRUE
THY1	OK	negbinomial.size	3.77216e-10	6.51194e-10	THY1	415	FALSE
ZYX	OK	negbinomial.size	0.0262088	0.0310342	ZYX	5564	FALSE
CLDN4	OK	negbinomial.size	0	0	CLDN4	9479	TRUE
ITGA3	OK	negbinomial.size	2.49312e-99	1.239e-98	ITGA3	3754	FALSE
CDH6	OK	negbinomial.size	0.000162406	0.000225239	CDH6	22	FALSE
IRS1	OK	negbinomial.size	7.22531e-47	2.3121e-46	IRS1	2043	FALSE
CDH11	OK	negbinomial.size	1.47678e-11	2.66878e-11	CDH11	206	FALSE
LAMA3	OK	negbinomial.size	2.13611e-44	6.57881e-44	LAMA3	4133	FALSE
COL16A1	OK	negbinomial.size	0.229122	0.250507	COL16A1	1774	FALSE
SRC	OK	negbinomial.size	1.85699e-24	4.33518e-24	SRC	2742	FALSE
PTEN	OK	negbinomial.size	6.36427e-14	1.21365e-13	PTEN	4719	FALSE
VCAN	OK	negbinomial.size	4.68547e-23	1.07096e-22	VCAN	206	FALSE
MYL9	OK	negbinomial.size	8.02575e-36	2.19371e-35	MYL9	1711	TRUE
CX3CL1	OK	negbinomial.size	4.21343e-08	6.85858e-08	CX3CL1	489	FALSE
FBN1	OK	negbinomial.size	4.221e-12	7.73456e-12	FBN1	129	FALSE
MSN	OK	negbinomial.size	7.85408e-72	3.06683e-71	MSN	1410	FALSE
ITGA2	OK	negbinomial.size	4.33369e-121	2.51584e-120	ITGA2	3757	FALSE
SLIT2	OK	negbinomial.size	0.0278782	0.0329515	SLIT2	29	FALSE
SHC1	OK	negbinomial.size	0.0696044	0.0794095	SHC1	2843	FALSE
PIK3R3	OK	negbinomial.size	1.27033e-83	5.48248e-83	PIK3R3	1496	FALSE
BMP1	OK	negbinomial.size	4.08287e-17	8.26655e-17	BMP1	1082	FALSE
ACTG2	OK	negbinomial.size	1.01665e-12	1.89466e-12	ACTG2	134	FALSE
IKBKG	OK	negbinomial.size	7.63362e-05	0.000108391	IKBKG	1575	FALSE
HRAS	OK	negbinomial.size	0.000631419	0.000843607	HRAS	3939	FALSE
MMP9	OK	negbinomial.size	2.94113e-13	5.52832e-13	MMP9	352	FALSE
TNFRSF11B	OK	negbinomial.size	7.6461e-11	1.34113e-10	TNFRSF11B	1487	FALSE
PKD1	OK	negbinomial.size	2.1456e-47	6.89959e-47	PKD1	1787	FALSE
EXOC4	OK	negbinomial.size	0	0	EXOC4	3437	TRUE
LYPD3	OK	negbinomial.size	8.51307e-27	2.05315e-26	LYPD3	1052	FALSE
LYN	OK	negbinomial.size	5.1169e-168	4.24897e-167	LYN	3641	FALSE
GAS1	OK	negbinomial.size	0.909061	0.916043	GAS1	63	FALSE
FLOT2	OK	negbinomial.size	0.782289	0.800596	FLOT2	2282	FALSE
GATA3	OK	negbinomial.size	8.02152e-19	1.67051e-18	GATA3	221	FALSE
AFAP1L2	OK	negbinomial.size	7.29098e-57	2.55769e-56	AFAP1L2	1003	FALSE
SHH	OK	negbinomial.size	0.000930985	0.00122882	SHH	953	FALSE
NRP1	OK	negbinomial.size	2.21637e-11	3.99434e-11	NRP1	348	FALSE
SCG2	OK	negbinomial.size	0.300831	0.324048	SCG2	31	FALSE
GLI1	OK	negbinomial.size	0.0236924	0.0281053	GLI1	89	FALSE
NRP2	OK	negbinomial.size	1.25786e-15	2.47796e-15	NRP2	733	FALSE
TLE1	OK	negbinomial.size	0.00821115	0.0102211	TLE1	3585	FALSE
L1CAM	OK	negbinomial.size	0.428883	0.452327	L1CAM	237	FALSE
CRMP1	OK	negbinomial.size	0.0192154	0.023129	CRMP1	10	FALSE
MMP14	OK	negbinomial.size	0.00600302	0.00754402	MMP14	2524	FALSE
CTSL	OK	negbinomial.size	0.0145206	0.0177054	CTSL	1304	FALSE
MMP13	OK	negbinomial.size	0.397836	0.420936	MMP13	76	FALSE
CD59	OK	negbinomial.size	5.53382e-255	7.56288e-254	CD59	6991	TRUE
CBLB	OK	negbinomial.size	0	0	CBLB	2500	FALSE
FN1	OK	negbinomial.size	4.69826e-22	1.06278e-21	FN1	1182	FALSE
LRP1	OK	negbinomial.size	5.82532e-171	5.02817e-170	LRP1	2567	FALSE
ZEB1	OK	negbinomial.size	6.67734e-90	3.08474e-89	ZEB1	360	FALSE
PIK3CA	OK	negbinomial.size	3.54795e-42	1.06764e-41	PIK3CA	1638	FALSE
RHOG	OK	negbinomial.size	2.67818e-05	3.88692e-05	RHOG	4054	FALSE
DYRK2	OK	negbinomial.size	0.0342581	0.0401309	DYRK2	3296	FALSE
ANG	OK	negbinomial.size	2.65369e-185	2.48689e-184	ANG	3666	FALSE
RAF1	OK	negbinomial.size	1.60154e-33	4.27078e-33	RAF1	3414	FALSE
HNF4A	OK	negbinomial.size	1.51248e-44	4.68013e-44	HNF4A	4520	FALSE
EIF2AK3	OK	negbinomial.size	3.0089e-97	1.45135e-96	EIF2AK3	1595	FALSE
ERN1	OK	negbinomial.size	3.98359e-115	2.1597e-114	ERN1	2397	FALSE
EIF2S1	OK	negbinomial.size	1.12844e-07	1.7924e-07	EIF2S1	4577	FALSE
EIF4E	OK	negbinomial.size	0.833629	0.845225	EIF4E	5799	FALSE
BAG3	OK	negbinomial.size	1.21279e-107	6.26449e-107	BAG3	3970	FALSE
EIF4G1	OK	negbinomial.size	1.05328e-07	1.67706e-07	EIF4G1	6061	FALSE
YWHAZ	OK	negbinomial.size	0.015115	0.018362	YWHAZ	9736	TRUE
IMP3	OK	negbinomial.size	5.17529e-08	8.3827e-08	IMP3	5481	FALSE
MAPK8	OK	negbinomial.size	3.29815e-191	3.22923e-190	MAPK8	3015	FALSE
GSK3B	OK	negbinomial.size	2.82285e-206	2.93935e-205	GSK3B	4141	FALSE
RAC1	OK	negbinomial.size	0	0	RAC1	10633	TRUE
TBK1	OK	negbinomial.size	4.23883e-40	1.23039e-39	TBK1	2096	FALSE
CSNK2B	OK	negbinomial.size	4.33658e-122	2.60991e-121	CSNK2B	7927	FALSE
PRKAA2	OK	negbinomial.size	0.789768	0.805735	PRKAA2	232	FALSE
PIN1	OK	negbinomial.size	3.00065e-96	1.43681e-95	PIN1	5656	FALSE
SMAD2	OK	negbinomial.size	0.805737	0.820751	SMAD2	4881	FALSE
PAK4	OK	negbinomial.size	0.0809429	0.0917073	PAK4	3407	FALSE
PLOD2	OK	negbinomial.size	2.53916e-07	4.00406e-07	PLOD2	1649	FALSE
SERPINH1	OK	negbinomial.size	0.000420139	0.00056827	SERPINH1	4075	FALSE
EGLN3	OK	negbinomial.size	1.77933e-203	1.82381e-202	EGLN3	2933	FALSE
PRDX1	OK	negbinomial.size	3.77424e-150	2.78191e-149	PRDX1	10145	TRUE
PSME3	OK	negbinomial.size	1.2092e-06	1.86206e-06	PSME3	3870	FALSE
HSPA4	OK	negbinomial.size	4.89251e-67	1.86598e-66	HSPA4	4662	FALSE
DNMT1	OK	negbinomial.size	4.72725e-09	7.89078e-09	DNMT1	3552	FALSE
EED	OK	negbinomial.size	2.26513e-18	4.67272e-18	EED	1836	FALSE
MCM7	OK	negbinomial.size	0.585955	0.61208	MCM7	4217	FALSE
TIMELESS	OK	negbinomial.size	2.45423e-05	3.5857e-05	TIMELESS	1147	FALSE
PPM1D	OK	negbinomial.size	1.32431e-58	4.69592e-58	PPM1D	1608	FALSE
PPP1R8	OK	negbinomial.size	0.672017	0.694241	PPP1R8	2535	FALSE
CDKN2A	OK	negbinomial.size	0.005724	0.00720719	CDKN2A	2561	FALSE
RACK1	OK	negbinomial.size	0	0	RACK1	2068	TRUE
PCBP1	OK	negbinomial.size	1.40905e-55	4.81426e-55	PCBP1	8352	FALSE
GLO1	OK	negbinomial.size	1.42363e-116	7.84793e-116	GLO1	6843	FALSE
TRIM28	OK	negbinomial.size	5.1524e-10	8.87132e-10	TRIM28	6112	FALSE
HDGF	OK	negbinomial.size	1.47388e-40	4.35525e-40	HDGF	6984	FALSE
TUFM	OK	negbinomial.size	1.68385e-56	5.87555e-56	TUFM	8384	FALSE
COL5A2	OK	negbinomial.size	5.51166e-27	1.34411e-26	COL5A2	389	FALSE
COL1A2	OK	negbinomial.size	1.31381e-117	7.36634e-117	COL1A2	1598	TRUE
LAMC1	OK	negbinomial.size	2.26158e-11	4.06464e-11	LAMC1	2274	FALSE
COL7A1	OK	negbinomial.size	1.38996e-10	2.4122e-10	COL7A1	288	FALSE
LOXL2	OK	negbinomial.size	6.67766e-06	1.00934e-05	LOXL2	177	FALSE
THBS2	OK	negbinomial.size	1.15448e-19	2.4669e-19	THBS2	233	FALSE
NNMT	OK	negbinomial.size	0.00247984	0.00318975	NNMT	1062	FALSE
TPM1	OK	negbinomial.size	0.0397944	0.0463679	TPM1	8348	TRUE
CDH2	OK	negbinomial.size	0.01971	0.0236376	CDH2	10	FALSE
COL11A1	OK	negbinomial.size	3.11842e-05	4.50592e-05	COL11A1	71	FALSE
FAP	OK	negbinomial.size	1.48007e-17	3.02469e-17	FAP	430	FALSE
FSTL1	OK	negbinomial.size	2.0986e-19	4.41244e-19	FSTL1	378	FALSE
POSTN	OK	negbinomial.size	4.50087e-25	1.05827e-24	POSTN	338	FALSE
SPP1	OK	negbinomial.size	0.00110774	0.00145336	SPP1	1228	FALSE
NID2	OK	negbinomial.size	1.78101e-05	2.63141e-05	NID2	126	FALSE
MMP3	OK	negbinomial.size	0.000195084	0.000267731	MMP3	278	FALSE
VIM	OK	negbinomial.size	3.32388e-224	3.82538e-223	VIM	2943	TRUE
LOXL1	OK	negbinomial.size	0.000479901	0.000646437	LOXL1	753	FALSE
FBLN5	OK	negbinomial.size	1.04688e-05	1.55727e-05	FBLN5	140	FALSE
COL12A1	OK	negbinomial.size	3.82769e-25	9.03226e-25	COL12A1	287	FALSE
ELN	OK	negbinomial.size	2.94734e-07	4.63658e-07	ELN	130	FALSE
COMP	OK	negbinomial.size	1.23165e-11	2.23194e-11	COMP	58	FALSE
SPOCK1	OK	negbinomial.size	0.000374462	0.000509641	SPOCK1	50	FALSE
IL32	OK	negbinomial.size	9.52605e-169	8.01166e-168	IL32	8857	TRUE
QSOX1	OK	negbinomial.size	2.95457e-64	1.10754e-63	QSOX1	5630	TRUE
EDIL3	OK	negbinomial.size	3.62498e-05	5.21489e-05	EDIL3	42	FALSE
CALD1	OK	negbinomial.size	1.2166e-66	4.61324e-66	CALD1	812	TRUE
MAGEE1	OK	negbinomial.size	0.386118	0.40986	MAGEE1	16	FALSE
FBLN1	OK	negbinomial.size	2.45207e-21	5.47128e-21	FBLN1	509	FALSE
SGCB	OK	negbinomial.size	1.92877e-05	2.83693e-05	SGCB	1557	FALSE
ECM1	OK	negbinomial.size	5.18182e-22	1.16414e-21	ECM1	1679	FALSE
FSTL3	OK	negbinomial.size	0.0323798	0.038135	FSTL3	1488	FALSE
DAB2	OK	negbinomial.size	0.564266	0.590365	DAB2	1714	FALSE
EMP3	OK	negbinomial.size	2.40569e-11	4.31183e-11	EMP3	1794	FALSE
BASP1	OK	negbinomial.size	6.14798e-10	1.05578e-09	BASP1	431	FALSE
ITGA5	OK	negbinomial.size	5.43955e-16	1.08132e-15	ITGA5	217	FALSE
MGP	OK	negbinomial.size	7.68252e-33	2.01589e-32	MGP	1010	TRUE
SDC1	OK	negbinomial.size	0.625198	0.64894	SDC1	5633	FALSE
PCOLCE	OK	negbinomial.size	3.66203e-08	6.00572e-08	PCOLCE	752	FALSE
GREM1	OK	negbinomial.size	1.49573e-38	4.28471e-38	GREM1	424	FALSE
COL5A3	OK	negbinomial.size	1.58843e-43	4.86919e-43	COL5A3	376	FALSE
HTRA1	OK	negbinomial.size	0.000167864	0.000231829	HTRA1	832	FALSE
SNTB1	OK	negbinomial.size	1.58836e-36	4.41512e-36	SNTB1	1734	FALSE
LRRC15	OK	negbinomial.size	0.856093	0.866662	LRRC15	18	FALSE
ACTA2	OK	negbinomial.size	5.70276e-72	2.24013e-71	ACTA2	1119	FALSE
EFEMP2	OK	negbinomial.size	1.18891e-09	2.03636e-09	EFEMP2	225	FALSE
MATN2	OK	negbinomial.size	0.0427081	0.0496746	MATN2	1025	FALSE
PCOLCE2	OK	negbinomial.size	0.0585413	0.0673738	PCOLCE2	39	FALSE
SERPINE2	OK	negbinomial.size	2.77152e-91	1.29865e-90	SERPINE2	3216	FALSE
ABI3BP	OK	negbinomial.size	1.0213e-07	1.63011e-07	ABI3BP	47	FALSE
FUCA1	OK	negbinomial.size	2.67559e-16	5.384e-16	FUCA1	3592	FALSE
SLIT3	OK	negbinomial.size	1.66445e-12	3.09313e-12	SLIT3	61	FALSE
LAMA1	OK	negbinomial.size	3.52841e-25	8.35609e-25	LAMA1	382	FALSE
COL8A2	OK	negbinomial.size	0.0028098	0.00359304	COL8A2	19	FALSE
FBN2	OK	negbinomial.size	0.0736538	0.0838835	FBN2	53	FALSE
IGFBP2	OK	negbinomial.size	0	0	IGFBP2	6349	TRUE
PFN2	OK	negbinomial.size	8.29925e-30	2.09396e-29	PFN2	1298	FALSE
CXCL8	OK	negbinomial.size	0	0	CXCL8	6136	TRUE
GLIPR1	OK	negbinomial.size	6.64106e-65	2.50376e-64	GLIPR1	1270	FALSE
ANPEP	OK	negbinomial.size	0	0	ANPEP	1509	FALSE
P3H1	OK	negbinomial.size	3.46379e-11	6.1412e-11	P3H1	768	FALSE
VEGFC	OK	negbinomial.size	2.65795e-05	3.86611e-05	VEGFC	23	FALSE
PLOD1	OK	negbinomial.size	0.0231478	0.0275589	PLOD1	2424	FALSE
MATN3	OK	negbinomial.size	0.706811	0.726752	MATN3	42	FALSE
CALU	OK	negbinomial.size	0.38597	0.40986	CALU	4940	FALSE
PRRX1	OK	negbinomial.size	7.10152e-09	1.18239e-08	PRRX1	187	FALSE
FMOD	OK	negbinomial.size	0.595275	0.620828	FMOD	353	FALSE
SFRP1	OK	negbinomial.size	0.0236051	0.0280524	SFRP1	17	FALSE
PLOD3	OK	negbinomial.size	0.000327622	0.00044775	PLOD3	4862	FALSE
APLP1	OK	negbinomial.size	0.677656	0.698966	APLP1	154	FALSE
FBLN2	OK	negbinomial.size	2.3733e-06	3.6291e-06	FBLN2	134	FALSE
MSX1	OK	negbinomial.size	0.0214715	0.0256096	MSX1	906	FALSE
FERMT2	OK	negbinomial.size	0.000401193	0.000544891	FERMT2	87	FALSE
SNAI2	OK	negbinomial.size	0.0363215	0.0424722	SNAI2	49	FALSE
TPM4	OK	negbinomial.size	3.65452e-05	5.24587e-05	TPM4	9096	FALSE
PMP22	OK	negbinomial.size	6.69221e-117	3.72042e-116	PMP22	2211	TRUE
COPA	OK	negbinomial.size	7.25374e-14	1.37528e-13	COPA	5296	FALSE
MFAP5	OK	negbinomial.size	0.253066	0.275309	MFAP5	61	FALSE
PTHLH	OK	negbinomial.size	0.00542151	0.00683944	PTHLH	123	FALSE
SFRP4	OK	negbinomial.size	4.01664e-08	6.55452e-08	SFRP4	202	FALSE
LGALS1	OK	negbinomial.size	2.71411e-31	7.00968e-31	LGALS1	5459	TRUE
RGS4	OK	negbinomial.size	0.128052	0.14286	RGS4	11	FALSE
NT5E	OK	negbinomial.size	1.39342e-82	5.93559e-82	NT5E	2561	FALSE
DPYSL3	OK	negbinomial.size	0.00713869	0.00891996	DPYSL3	377	FALSE
PPIB	OK	negbinomial.size	3.46723e-72	1.37849e-71	PPIB	8708	FALSE
PDLIM4	OK	negbinomial.size	3.84785e-05	5.51133e-05	PDLIM4	370	FALSE
CTHRC1	OK	negbinomial.size	4.33599e-05	6.19697e-05	CTHRC1	719	FALSE
ECM2	OK	negbinomial.size	0.323856	0.346573	ECM2	53	FALSE
CRLF1	OK	negbinomial.size	0.958447	0.95991	CRLF1	88	FALSE
PRSS2	OK	negbinomial.size	0	0	PRSS2	559	TRUE
CADM1	OK	negbinomial.size	2.14075e-40	6.26933e-40	CADM1	203	FALSE
OXTR	OK	negbinomial.size	0.284984	0.308497	OXTR	122	FALSE
MMP1	OK	negbinomial.size	0.189521	0.208601	MMP1	719	FALSE
CAPG	OK	negbinomial.size	3.75013e-37	1.05132e-36	CAPG	6643	FALSE
CAP2	OK	negbinomial.size	2.35353e-09	3.98945e-09	CAP2	309	FALSE
MXRA5	OK	negbinomial.size	0.295173	0.318476	MXRA5	332	FALSE
FOXC2	OK	negbinomial.size	1.93405e-45	6.09969e-45	FOXC2	335	FALSE
NTM	OK	negbinomial.size	0.00223527	0.00289219	NTM	55	FALSE
PVR	OK	negbinomial.size	0.0799665	0.0907578	PVR	2247	FALSE
COLGALT1	OK	negbinomial.size	0.00118877	0.00155346	COLGALT1	3341	FALSE
GPX7	OK	negbinomial.size	0.0117387	0.0144476	GPX7	306	FALSE
WIPF1	OK	negbinomial.size	1.52112e-40	4.47468e-40	WIPF1	715	FALSE
CCL22	OK	negbinomial.size	0.00112818	0.00147722	CCL22	87	FALSE
CCR7	OK	negbinomial.size	4.42347e-08	7.18266e-08	CCR7	178	FALSE
AQP9	OK	negbinomial.size	2.39328e-20	5.21592e-20	AQP9	147	FALSE
OSM	OK	negbinomial.size	5.65524e-07	8.7703e-07	OSM	139	FALSE
TNFSF15	OK	negbinomial.size	1.51564e-34	4.09161e-34	TNFSF15	1247	FALSE
NLRP3	OK	negbinomial.size	0.000496818	0.000667854	NLRP3	79	FALSE
CD82	OK	negbinomial.size	3.87462e-38	1.10032e-37	CD82	3731	FALSE
AHR	OK	negbinomial.size	2.88207e-25	6.85013e-25	AHR	4616	FALSE
HAS2	OK	negbinomial.size	0.784492	0.801599	HAS2	188	FALSE
AXL	OK	negbinomial.size	1.02215e-05	1.52394e-05	AXL	187	FALSE
PDPN	OK	negbinomial.size	1.25745e-14	2.4333e-14	PDPN	116	FALSE
MET	OK	negbinomial.size	3.08882e-87	1.37841e-86	MET	4533	FALSE
ROS1	OK	negbinomial.size	0.00664756	0.00833805	ROS1	13	FALSE
C5AR1	OK	negbinomial.size	2.46905e-08	4.0594e-08	C5AR1	232	FALSE
NDRG2	OK	negbinomial.size	1.16291e-05	1.72595e-05	NDRG2	1744	FALSE
ESR1	OK	negbinomial.size	1.94523e-39	5.62146e-39	ESR1	154	FALSE
VTN	OK	negbinomial.size	0.530932	0.557266	VTN	11	FALSE
CBR1	OK	negbinomial.size	1.02373e-10	1.78134e-10	CBR1	4240	FALSE
EPHA2	OK	negbinomial.size	0.00011529	0.000162297	EPHA2	5990	TRUE
ABCC3	OK	negbinomial.size	0	0	ABCC3	5524	TRUE
PGRMC1	OK	negbinomial.size	4.26492e-86	1.8904e-85	PGRMC1	6164	FALSE
CCL25	OK	negbinomial.size	0.113186	0.127578	CCL25	59	FALSE
ALDH1A1	OK	negbinomial.size	0.176754	0.194875	ALDH1A1	1415	FALSE
ALAD	OK	negbinomial.size	0.00279699	0.00358365	ALAD	1719	FALSE
HSP90AA1	OK	negbinomial.size	3.15167e-30	8.01354e-30	HSP90AA1	11492	TRUE
TGFA	OK	negbinomial.size	1.72772e-33	4.58861e-33	TGFA	1379	FALSE
SOX9	OK	negbinomial.size	2.17987e-114	1.17213e-113	SOX9	6872	FALSE
HS6ST2	OK	negbinomial.size	0.0120616	0.0147896	HS6ST2	505	FALSE
TXN	OK	negbinomial.size	0	0	TXN	11690	TRUE
PTPA	OK	negbinomial.size	1.34055e-100	6.76462e-100	PTPA	635	FALSE
MDM2	OK	negbinomial.size	0	0	MDM2	3432	TRUE
FBXW7	OK	negbinomial.size	0	0	FBXW7	3247	TRUE
TP63	OK	negbinomial.size	1.86208e-21	4.16902e-21	TP63	40	FALSE
SP1	OK	negbinomial.size	3.70489e-36	1.02118e-35	SP1	3129	FALSE
CEBPA	OK	negbinomial.size	9.2259e-07	1.4274e-06	CEBPA	2663	FALSE
VDR	OK	negbinomial.size	2.12341e-127	1.31411e-126	VDR	2657	FALSE
HDAC3	OK	negbinomial.size	0.920344	0.924572	HDAC3	3677	FALSE
KRT17	OK	negbinomial.size	0	0	KRT17	2985	TRUE
PTPN14	OK	negbinomial.size	3.03459e-81	1.27609e-80	PTPN14	1351	FALSE
GLS2	OK	negbinomial.size	0.820173	0.83306	GLS2	552	FALSE
GLS	OK	negbinomial.size	9.06589e-147	6.46437e-146	GLS	4557	FALSE
ABCB1	OK	negbinomial.size	4.90605e-170	4.1797e-169	ABCB1	1249	FALSE
BSG	OK	negbinomial.size	2.63165e-212	2.78445e-211	BSG	9017	TRUE
CYB5R1	OK	negbinomial.size	8.37332e-06	1.25409e-05	CYB5R1	1720	FALSE
AGO2	OK	negbinomial.size	1.06731e-52	3.55409e-52	AGO2	4899	FALSE
EPCAM	OK	negbinomial.size	0	0	EPCAM	9809	TRUE
TYRO3	OK	negbinomial.size	0.00010517	0.000148369	TYRO3	470	FALSE
ATXN1	OK	negbinomial.size	0	0	ATXN1	3145	FALSE
RUNX1	OK	negbinomial.size	1.38306e-19	2.9362e-19	RUNX1	3687	FALSE
FZD2	OK	negbinomial.size	0.120482	0.134874	FZD2	96	FALSE
PRKCE	OK	negbinomial.size	1.03452e-272	1.44393e-271	PRKCE	1247	FALSE
LTBP1	OK	negbinomial.size	1.48111e-49	4.80994e-49	LTBP1	1597	FALSE
SPOP	OK	negbinomial.size	0.00126796	0.00165364	SPOP	2986	FALSE
MTA1	OK	negbinomial.size	0.732354	0.751837	MTA1	3478	FALSE
EFEMP1	OK	negbinomial.size	0.00102347	0.00134548	EFEMP1	85	FALSE
TGFBR2	OK	negbinomial.size	2.96394e-100	1.48423e-99	TGFBR2	3325	FALSE
KIT	OK	negbinomial.size	0.310045	0.332809	KIT	69	FALSE
THBD	OK	negbinomial.size	4.88832e-05	6.97118e-05	THBD	103	FALSE
FGFR1	OK	negbinomial.size	9.35346e-07	1.44373e-06	FGFR1	432	FALSE
KAT2B	OK	negbinomial.size	1.72569e-06	2.64498e-06	KAT2B	467	FALSE
TNS1	OK	negbinomial.size	0.000163191	0.000225851	TNS1	179	FALSE
FOXJ2	OK	negbinomial.size	1.79101e-05	2.64023e-05	FOXJ2	792	FALSE
ABCG2	OK	negbinomial.size	3.91613e-24	9.10987e-24	ABCG2	186	FALSE
BTRC	OK	negbinomial.size	8.78927e-130	5.544e-129	BTRC	1325	FALSE
MMP11	OK	negbinomial.size	0.0330237	0.0388236	MMP11	622	FALSE
MMP7	OK	negbinomial.size	0	0	MMP7	4048	TRUE
CTSZ	OK	negbinomial.size	4.55069e-16	9.12922e-16	CTSZ	5633	FALSE
ITGA6	OK	negbinomial.size	6.74301e-152	5.02661e-151	ITGA6	6659	TRUE
GLIPR2	OK	negbinomial.size	2.06675e-07	3.26695e-07	GLIPR2	604	FALSE
TNFSF11	OK	negbinomial.size	0.157486	0.173923	TNFSF11	84	FALSE
IRF6	OK	negbinomial.size	2.21766e-09	3.76887e-09	IRF6	3986	FALSE
RNH1	OK	negbinomial.size	4.09925e-11	7.24828e-11	RNH1	6507	FALSE
AGER	OK	negbinomial.size	0.000955203	0.00125826	AGER	161	FALSE
ETV4	OK	negbinomial.size	0.228766	0.250507	ETV4	4481	FALSE
CYP7B1	OK	negbinomial.size	6.94419e-14	1.3204e-13	CYP7B1	41	FALSE
NR1I2	OK	negbinomial.size	8.57667e-34	2.29645e-33	NR1I2	1100	FALSE
BMP6	OK	negbinomial.size	3.0805e-15	6.03227e-15	BMP6	63	FALSE
SIAH1	OK	negbinomial.size	0.000161499	0.000224457	SIAH1	2782	FALSE
CTBP1	OK	negbinomial.size	0.935529	0.93839	CTBP1	4632	FALSE
ESR2	OK	negbinomial.size	4.16473e-14	7.98849e-14	ESR2	99	FALSE
CCR5	OK	negbinomial.size	0.00235106	0.00303005	CCR5	68	FALSE
IL11	OK	negbinomial.size	0.0210056	0.0250996	IL11	93	FALSE
HDAC9	OK	negbinomial.size	2.63351e-20	5.72048e-20	HDAC9	418	FALSE
APBB1	OK	negbinomial.size	0.00225681	0.0029143	APBB1	169	FALSE
CCR2	OK	negbinomial.size	0.250226	0.272672	CCR2	16	FALSE
CCL19	OK	negbinomial.size	2.33922e-05	3.42529e-05	CCL19	76	FALSE
CSK	OK	negbinomial.size	2.51343e-11	4.49268e-11	CSK	2871	FALSE
EIF5A	OK	negbinomial.size	0.0669523	0.0765169	EIF5A	8176	TRUE
MTOR	OK	negbinomial.size	4.25777e-24	9.86961e-24	MTOR	1608	FALSE
BRAF	OK	negbinomial.size	5.08492e-233	6.06492e-232	BRAF	2143	FALSE
POMC	OK	negbinomial.size	0.418034	0.441595	POMC	71	FALSE
IFT88	OK	negbinomial.size	1.06998e-40	3.17606e-40	IFT88	1845	FALSE
PEBP1	OK	negbinomial.size	5.85099e-224	6.61767e-223	PEBP1	8827	FALSE
TLE4	OK	negbinomial.size	2.50235e-106	1.27251e-105	TLE4	3155	FALSE
SIRT1	OK	negbinomial.size	0.0317362	0.0374441	SIRT1	2433	FALSE
CFTR	OK	negbinomial.size	1.08408e-283	1.58034e-282	CFTR	2788	FALSE
SPRY2	OK	negbinomial.size	7.80182e-05	0.00011054	SPRY2	2914	FALSE
FGF9	OK	negbinomial.size	0.272482	0.295941	FGF9	86	FALSE
ETV1	OK	negbinomial.size	4.84764e-48	1.56653e-47	ETV1	1159	FALSE
MMD	OK	negbinomial.size	0.00684692	0.00857171	MMD	1603	FALSE
KCNN4	OK	negbinomial.size	1.19363e-18	2.4701e-18	KCNN4	4672	FALSE
EPHB2	OK	negbinomial.size	3.6598e-159	2.8245e-158	EPHB2	3760	FALSE
ST6GAL1	OK	negbinomial.size	2.41787e-09	4.08794e-09	ST6GAL1	1663	FALSE
EPB41L3	OK	negbinomial.size	3.06033e-07	4.80281e-07	EPB41L3	127	FALSE
MYCN	OK	negbinomial.size	3.71616e-08	6.07931e-08	MYCN	89	FALSE
CAMK1D	OK	negbinomial.size	1.65273e-144	1.14125e-143	CAMK1D	1942	FALSE
PDCD1	OK	negbinomial.size	3.25847e-06	4.97107e-06	PDCD1	121	FALSE
PCSK1	OK	negbinomial.size	5.95587e-148	4.29346e-147	PCSK1	581	FALSE
FOXA2	OK	negbinomial.size	9.0289e-12	1.64071e-11	FOXA2	2727	FALSE
NEUROG3	OK	negbinomial.size	0.778661	0.798127	NEUROG3	19	FALSE
FOXO1	OK	negbinomial.size	1.85217e-233	2.29249e-232	FOXO1	2018	FALSE
