# Supplementary material for: Unraveling temporal and spatial biomarkers of epithelial-mesenchymal transition in colorectal cancer: insights into the crucial role of immunosuppressive cells
Source: J Transl Med. 2023 Nov 8;21:794. doi: 10.1186/s12967-023-04600-x (PMC10633927; doi:10.1186/s12967-023-04600-x)
Supplement: Supplementary file 14 — Additional file 14: Survial analysis for pseudotime differential genes. [file 12967_2023_4600_MOESM14_ESM.xlsx]

## Sheet: Table S14
Table S14 : Survial analysis for pseudotime differential genes
	hr	lower.95	upper.95	pvalue
CXCL1	0.844409	0.745295	0.956702	0.00835145
ETS2	0.736239	0.58262	0.930362	0.0127975
NAMPT	0.801146	0.642453	0.999039	0.0478858
GADD45B	1.37376	1.08886	1.73321	0.00767841
BCL6	1.37071	1.05814	1.77562	0.0216931
ANGPTL4	1.27886	1.07267	1.52468	0.00781772
CAVIN1	1.22791	1.0249	1.47113	0.0267482
BGN	1.15112	1.00824	1.31425	0.0367557
VHL	0.63995	0.425467	0.962556	0.0344616
GLRX	0.746184	0.57848	0.962506	0.0228937
CLU	1.21768	1.05928	1.39978	0.00656419
CTNNB1	0.590648	0.41316	0.844382	0.00409031
CDC42	0.731833	0.544588	0.98346	0.0438139
TIMP1	1.45151	1.16915	1.80206	0.00069148
HSPB1	1.30803	1.10116	1.55377	0.00198016
BRCA1	0.671504	0.474708	0.949883	0.0235818
MYB	0.781433	0.621883	0.981916	0.0418069
FKBP5	0.745276	0.558112	0.995205	0.0436526
PTPN6	2.12827	1.38197	3.2776	0.000479128
SRF	1.6807	1.13871	2.48064	0.0101505
CRYAB	1.28467	1.07387	1.53684	0.00848802
TAGLN	1.1417	1.00975	1.2909	0.0363418
LAMA2	1.26539	1.01516	1.5773	0.0440232
MYL9	1.15512	1.00757	1.32428	0.0412017
COMP	1.15291	1.04224	1.27534	0.00724211
MGP	1.14516	1.01418	1.29306	0.0315994
CXCL8	0.901346	0.816212	0.995361	0.0366528
PTPA	1.5614	1.02006	2.39002	0.0294318
BSG	1.36812	0.992972	1.885	0.0437216
CYB5R1	1.57251	1.04087	2.37568	0.0319814
EPHB2	0.784015	0.634725	0.96842	0.0268289

## Sheet: Table S15
Table S15: Correlation for genes and Pseudotime in stage I/II
	gene	cor	p
CXCL1	CXCL1	0.116289	6.90702e-37
ETS2	ETS2	0.143619	1.56089e-55
NAMPT	NAMPT	0.114468	8.69772e-36
GADD45B	GADD45B	0.139511	1.79232e-52
BCL6	BCL6	0.0545137	2.99261e-09
ANGPTL4	ANGPTL4	0.117925	6.84792e-38
CAVIN1	CAVIN1	0.0736693	1.04545e-15
BGN	BGN	-0.0654724	1.0269e-12
VHL	VHL	0.00593485	0.518709
GLRX	GLRX	-0.33507	3.72491e-308
CLU	CLU	-0.146111	1.96071e-57
CTNNB1	CTNNB1	0.0746501	4.34654e-16
CDC42	CDC42	-0.142487	1.11107e-54
TIMP1	TIMP1	-0.478628	0
HSPB1	HSPB1	-0.22468	3.2753e-135
BRCA1	BRCA1	0.00773708	0.400174
MYB	MYB	0.107972	5.26084e-32
FKBP5	FKBP5	0.109418	7.91883e-33
PTPN6	PTPN6	0.0502923	4.44883e-08
SRF	SRF	0.114195	1.26682e-35
CRYAB	CRYAB	0.0429746	2.93894e-06
TAGLN	TAGLN	-0.00461332	0.615923
LAMA2	LAMA2	-0.0176076	0.0555269
MYL9	MYL9	0.0329788	0.000334563
COMP	COMP	-0.0220865	0.0163105
MGP	MGP	-0.271458	7.86996e-199
CXCL8	CXCL8	0.116381	6.06514e-37
PTPA	PTPA	0.152389	2.25602e-62
BSG	BSG	-0.140696	2.40085e-53
CYB5R1	CYB5R1	-0.0788577	8.84623e-18
EPHB2	EPHB2	0.13019	7.20365e-46

## Sheet: Table S16
Table S16: Correlation for genes and Pseudotime in stage III
	gene	cor	p
CXCL1	CXCL1	0.207829	1.12228e-136
ETS2	ETS2	-0.0636511	4.51339e-14
NAMPT	NAMPT	-0.133056	2.02764e-56
GADD45B	GADD45B	0.01445	0.0870303
BCL6	BCL6	-0.181885	1.3183e-104
ANGPTL4	ANGPTL4	-0.148827	2.78693e-70
CAVIN1	CAVIN1	-0.142423	1.85098e-64
BGN	BGN	0.0271959	0.00127672
VHL	VHL	-0.0317783	0.000167103
GLRX	GLRX	0.248763	7.90328e-197
CLU	CLU	-0.0667202	2.57649e-15
CTNNB1	CTNNB1	0.0293046	0.000518481
CDC42	CDC42	0.202709	5.55649e-130
TIMP1	TIMP1	0.26025	6.89006e-216
HSPB1	HSPB1	0.227794	1.59934e-164
BRCA1	BRCA1	-0.230409	2.22354e-168
MYB	MYB	-0.0542321	1.30198e-10
FKBP5	FKBP5	-0.215093	1.7451e-146
PTPN6	PTPN6	-0.117845	1.47159e-44
SRF	SRF	0.205938	3.49709e-134
CRYAB	CRYAB	-0.00464688	0.58212
TAGLN	TAGLN	0.0423333	5.29237e-07
LAMA2	LAMA2	-0.168048	2.31938e-89
MYL9	MYL9	0.0785677	1.18045e-20
COMP	COMP	-0.00146215	0.862534
MGP	MGP	0.00932129	0.269654
CXCL8	CXCL8	0.323607	0
PTPA	PTPA	-0.374879	0
BSG	BSG	0.307033	6.57285e-304
CYB5R1	CYB5R1	0.163559	1.09371e-84
EPHB2	EPHB2	-0.263531	1.64107e-221
