# Supplementary material for: Unraveling temporal and spatial biomarkers of epithelial-mesenchymal transition in colorectal cancer: insights into the crucial role of immunosuppressive cells
Source: J Transl Med. 2023 Nov 8;21:794. doi: 10.1186/s12967-023-04600-x (PMC10633927; doi:10.1186/s12967-023-04600-x)
Supplement: Supplementary file 15 — Additional file 15: Correlation for genes and Pseudotime in stage I/II. [file 12967_2023_4600_MOESM15_ESM.xlsx]

## Sheet: TableS1
Table-S1:Collected data
year	Papers	data	cancertype	cellnumber
2021	This paper		rectal carcinoma	9670	Chromium
2020	A pan-cancer blueprint of the heterogeneous tumor microenvironment revealed by single-cell profiling	E-MTAB-8107	Colorectal Cancer	25432	Chromium
2020	Lineage-dependent gene expression programs influence the immune landscape of colorectal cancer.	GSE144735	Colorectal Cancer	11866	Chromium
2020	Lineage-dependent gene expression programs influence the immune landscape of colorectal cancer.	GSE132257	Colorectal Cancer	8837	Chromium
2020	Lineage-dependent gene expression programs influence the immune landscape of colorectal cancer.	GSE132465	Colorectal Cancer	43884	Chromium

## Sheet: TableS2-S5
Table-S2:Patients cell number statistics				Table-S3:Samples cell number statistics			Table-S4:Clinical stage cell number statistics				Table-S5:Cluster cell number statistics
	V1			Samples	cell number		Stage	cell number	samples numbers		Cluster	SingleR	cell number
CC1	3911			CC1	3911		StageI	16796	7		0	Epithelial_cells	17586
CC2	5759			CC2	5759		StageII	28350	18		1	T_cells	17268
KUL01	4051			KUL01-B	2129		StageIII	54543	24		2	T_cells	12327
KUL19	6391			KUL01-T	1922						3	Macrophage	11726
KUL28	834			KUL19-B	3263						4	Epithelial_cells	10625
KUL30	1318			KUL19-T	3128						5	B_cell	5688
KUL31	1194			KUL28-B	406						6	Fibroblasts	4068
scrEXT001	2712			KUL28-T	428						7	Epithelial_cells	3717
scrEXT002	2901			KUL30-B	766						8	Endothelial_cells	3661
scrEXT009	4936			KUL30-T	552						9	B_cell	3608
scrEXT010	4461			KUL31-B	1119						10	Epithelial_cells	2454
scrEXT018	3770			KUL31-T	75						11	T_cells	2104
scrEXT019	2271			scrEXT001	2712						12	Tissue_stem_cells	1817
scrEXT021	709			scrEXT002	2901						13	B_cell	1769
scrEXT022	621			scrEXT009	4936						14	CMP	613
scrEXT024	530			scrEXT010	4461						15	Monocyte	392
scrEXT025	720			scrEXT018	3770						16	T_cells	266
scrEXT027	747			scrEXT019	2271
scrEXT028	1054			scrEXT021	709
SMC01	2791			scrEXT022	621
SMC02	1689			scrEXT024	530
SMC03	2123			scrEXT025	720
SMC04	1841			scrEXT027	747
SMC05	660			scrEXT028	1054
SMC06	1541			SMC01-T	2791
SMC07	4070			SMC02-T	1689
SMC08	2089			SMC03-T	2123
SMC09	3789			SMC04-T	1841
SMC10	2200			SMC05-T	660
SMC11	1698			SMC06-T	1541
SMC13T.A1	2411			SMC07-T	4070
SMC14	1749			SMC08-T	2089
SMC15	2027			SMC09-T	3789
SMC16	2956			SMC10-T	2200
SMC17	1343			SMC11-T	1698
SMC171	5083			SMC13T.A1	2411
SMC18	1936			SMC14-T	1749
SMC19	1540			SMC15-T	2027
SMC20	1681			SMC16-T	2956
SMC22	2363			SMC17-T	1343
SMC23	1639			SMC171.T.BEL	1652
SMC24	1580			SMC171.T.SGI	1660
				SMC171.T.SING	1771
				SMC18-T	1936
				SMC19-T	1540
				SMC20-T	1681
				SMC22-T	2363
				SMC23-T	1639
				SMC24-T	1580

## Sheet: TableS6
Table-S6:Marker genes first annotation
p_val	avg_log2FC	pct.1	pct.2	p_val_adj	cluster	gene
0	Inf	0.519	0.326	0	0	IFI6
0	Inf	0.982	0.681	0	0	S100A11
0	Inf	0.986	0.94	0	0	RPL37A
0	Inf	0.996	0.96	0	0	PTMA
0	Inf	0.671	0.162	0	0	CXCL1
0	Inf	0.736	0.203	0	0	CXCL3
0	Inf	0.613	0.2	0	0	CXCL2
0	Inf	0.988	0.96	0	0	RPS14
0	Inf	0.947	0.588	0	0	SEC61G
0	Inf	0.988	0.942	0	0	RPL30
0	Inf	0.989	0.957	0	0	RPS6
0	Inf	0.267	0.07	0	0	SPINK4
0	Inf	0.992	0.957	0	0	RPL12
0	Inf	0.989	0.951	0	0	RPS24
0	Inf	0.991	0.964	0	0	RPLP2
0	Inf	0.974	0.723	0	0	NEAT1
0	Inf	0.328	0.03	0	0	GAL
0	Inf	0.989	0.954	0	0	RPS3
0	Inf	0.994	0.903	0	0	GAPDH
0	Inf	0.995	0.362	0	0	KRT8
0	Inf	0.995	0.978	0	0	RPL41
0	Inf	0.693	0.122	0	0	CKB
0	Inf	0.862	0.301	0	0	PHGR1
0	Inf	0.971	0.927	0	0	RPS17
0	Inf	0.983	0.241	0	0	KRT19
0	Inf	0.99	0.907	0	0	EIF1
0	Inf	0.991	0.945	0	0	RPL36
0	Inf	0.989	0.958	0	0	RPL18A
0	Inf	0.994	0.972	0	0	RPL28
0	Inf	0.985	0.894	0	0	RPS21
0	Inf	0.623	0.108	0	0	TFF1
0	Inf	0.989	0.719	0	0	SAT1
0	Inf	0.993	0.936	0	0	MT-ND3
5.17777e-52	Inf	0.683	0.634	1.85488e-47	0	S100A4
0	159.066	0.42	0.069	0	1	TNFRSF4
0	33.9935	0.545	0.233	0	1	CD69
0	30.5155	0.643	0.156	0	1	CD7
0	16.6314	0.391	0.245	0	1	DUSP4
0	15.0279	0.829	0.647	0	1	SARAF
0	13.976	0.407	0.08	0	1	TNFRSF18
0	10.9018	0.523	0.12	0	1	TRBC1
0	6.95517	0.571	0.351	0	1	LEPROTL1
6.42704e-73	119.043	0.357	0.438	2.30242e-68	1	HSPA1A
0.00297242	26.7807	0.253	0.255	1	1	CLEC2B
0	Inf	0.324	0.146	0	2	CCL4L2
0	72.0745	0.365	0.024	0	2	IFNG
0	47.4611	0.364	0.04	0	2	LAG3
0	40.3312	0.842	0.064	0	2	NKG7
0	14.1832	0.393	0.123	0	2	KLRB1
0	10.933	0.435	0.094	0	2	APOBEC3G
0	6.73912	0.339	0.107	0	2	TBC1D10C
1.0619e-293	44.6593	0.445	0.278	3.80414e-289	2	RGS2
2.61911e-180	44.6633	0.697	0.553	9.38271e-176	2	SRSF7
2.98762e-60	20.5531	0.307	0.25	1.07028e-55	2	CMC1
0	Inf	0.39	0.083	0	3	SPP1
0	Inf	0.884	0.637	0	3	CD74
0	Inf	0.896	0.393	0	3	HLA-DRA
0	Inf	0.837	0.23	0	3	LYZ
0	Inf	0.667	0.16	0	3	CCL3
0	Inf	0.475	0.126	0	3	APOE
0	Inf	0.443	0.094	0	3	APOC1
0	Inf	0.531	0.099	0	3	CCL3L3
0	698.286	0.501	0.053	0	3	C1QB
0	498.194	0.799	0.336	0	3	HLA-DPB1
0	0.828866	0.156	0.508	0	4	DDX24
1.21645e-287	3.06738	0.173	0.329	4.35781e-283	4	CYB5A
2.40603e-274	28.19	0.118	0.274	8.61938e-270	4	THUMPD3-AS1
0	23.9502	0.573	0.203	0	5	SMIM14
0	13.806	0.316	0.037	0	5	LY9
0	10.472	0.888	0.282	0	5	CD37
0	7.21936	0.343	0.016	0	5	TNFRSF13B
0	5.8362	0.64	0.075	0	5	CD79B
0	3.58732	0.599	0.018	0	5	BANK1
0	3.13372	0.445	0.015	0	5	TNFRSF13C
1.98697e-114	2.14772	0.189	0.325	7.11812e-110	5	BUB3
1.03426e-71	24.6474	0.362	0.244	3.70512e-67	5	LCP1
3.72431e-19	11.0039	0.277	0.226	1.3342e-14	5	CCDC50
0	Inf	0.97	0.101	0	6	COL3A1
0	Inf	0.975	0.138	0	6	SPARC
0	Inf	0.987	0.108	0	6	COL1A2
0	Inf	0.659	0.116	0	6	MGP
0	Inf	0.944	0.076	0	6	LUM
0	Inf	0.501	0.154	0	6	CFD
0	Inf	0.988	0.511	0	6	CST3
0	846.897	0.373	0.008	0	6	CCL11
0	822.563	0.555	0.022	0	6	SFRP2
0	725.46	0.947	0.062	0	6	DCN
0	Inf	0.997	0.963	0	7	RPL34
0	245.62	0.829	0.077	0	7	UBE2C
0	210.541	0.809	0.32	0	7	HIST1H4C
0	149.403	0.999	0.787	0	7	HMGB1
0	138.86	0.939	0.727	0	7	SUB1
0	128.762	0.923	0.591	0	7	CSTB
0	108.564	0.666	0.259	0	7	NCOA7
6.764e-281	94.1375	0.339	0.134	2.42313e-276	7	EREG
8.1019e-40	114.776	0.261	0.165	2.90243e-35	7	S100A9
3.78098e-06	Inf	0.241	0.255	0.13545	7	CCL4
0	294.504	0.911	0.778	0	8	SRP14
0	240.872	0.638	0.009	0	8	CLDN5
0	221.56	0.353	0.007	0	8	ACKR1
0	177.716	0.256	0.002	0	8	SELE
0	165.287	0.927	0.555	0	8	FKBP1A
0	154.714	0.705	0.106	0	8	SPRY1
0	152.868	0.625	0.112	0	8	SLC9A3R2
0	148.983	0.802	0.016	0	8	PLVAP
0	122.797	0.29	0.05	0	8	PGF
0	113.258	0.869	0.021	0	8	RAMP2
0	784.233	0.331	0.007	0	9	IGLV6-57
0	485.152	0.276	0.008	0	9	IGKV1-12
0	339.44	0.997	0.694	0	9	SSR4
0	212.483	0.834	0.499	0	9	HSPA5
0	202.358	0.987	0.413	0	9	XBP1
0	167.308	0.961	0.045	0	9	DERL3
0	141.791	0.996	0.499	0	9	HERPUD1
0	140.348	0.991	0.556	0	9	HSP90B1
0	134.761	0.996	0.07	0	9	MZB1
0	131.692	0.394	0.007	0	9	IGLV3-1
2.8517e-73	5.30827	0.159	0.316	1.02159e-68	10	CYB5A
0	3.96041	0.255	0.029	0	11	IGLC1
0	2.6233	0.481	0.121	0	11	SIK3
0	2.46398	0.595	0.06	0	11	RACK1
0	2.30676	0.342	0.021	0	11	BICDL1
0	2.09258	0.441	0.116	0	11	DENND4A
0	1.91009	0.329	0.045	0	11	CDC14A
0	1.89014	0.354	0.101	0	11	PDE3B
0	1.78026	0.356	0.058	0	11	CAMK4
0	1.75904	0.394	0.103	0	11	STAT4
0	1.7553	0.545	0.062	0	11	ATP5F1E
0	Inf	0.917	0.097	0	12	ACTA2
0	409.706	0.997	0.116	0	12	CALD1
0	285.634	0.834	0.021	0	12	RGS5
0	109.612	0.636	0.015	0	12	MYH11
0	104.845	0.953	0.506	0	12	DSTN
0	97.6411	0.414	0.017	0	12	ACTG2
0	96.3815	0.972	0.135	0	12	MYL9
0	81.2	0.846	0.033	0	12	PPP1R14A
0	63.0164	0.833	0.236	0	12	ADIRF
2.64352e-248	109.625	0.675	0.361	9.47016e-244	12	GADD45B
4.51567e-34	0.454108	0.187	0.321	1.61769e-29	13	PABPC4
0	Inf	0.843	0.024	0	14	TPSB2
0	Inf	0.896	0.01	0	14	TPSAB1
0	94.5463	0.883	0.004	0	14	CPA3
0	63.6717	0.525	0.002	0	14	CTSG
0	43.4754	0.804	0.001	0	14	MS4A2
0	28.5111	0.294	0.001	0	14	ADCYAP1
0	20.3602	0.532	0.001	0	14	HDC
5.57323e-249	26.3253	0.768	0.27	1.99656e-244	14	SAMSN1
1.39111e-37	29.2798	0.465	0.268	4.9835e-33	14	NSMCE1
4.26116e-36	22.2821	0.295	0.133	1.52652e-31	14	ALAS1
0	32.5106	0.895	0.153	0	15	GZMB
0	18.1625	0.753	0.016	0	15	PLD4
0	17.0433	0.847	0.043	0	15	IRF4
0	16.6648	0.809	0.167	0	15	LDLRAD4
0	15.1461	0.783	0.002	0	15	LILRA4
0	14.2507	0.707	0.071	0	15	SLC15A4
0	14.1829	0.87	0.2	0	15	IRF7
1.11263e-220	22.3065	0.796	0.229	3.98588e-216	15	NR3C1
2.9379e-137	20.6792	0.538	0.132	1.05247e-132	15	ATF5
1.2926e-94	51.262	0.686	0.26	4.63062e-90	15	LTB
1.11783e-08	0.478689	0.301	0.171	0.000400452	16	SEPT1
0.00131571	2.58605	0.282	0.205	1	16	DNTTIP2

## Sheet: TableS7
Table-S6:Marker genes for immune cells
p_val	avg_log2FC	pct.1	pct.2	p_val_adj	cluster	gene	annotation
2.45683e-154	4.97054	0.474	0.196	8.80135e-150	0	RORA	Th
1.8342e-123	12.9532	0.859	0.718	6.57084e-119	0	SARAF	Th
9.58081e-100	8.93329	0.465	0.232	3.43223e-95	0	CD3G	Th
4.4479e-60	65.1557	0.613	0.435	1.59341e-55	0	CD69	Th
4.0447e-45	12.5089	0.391	0.244	1.44897e-40	0	ITM2A	Th
5.26908e-26	4.30804	0.403	0.299	1.8876e-21	0	NR3C1	Th
3.93835e-16	6.86587	0.108	0.181	1.41087e-11	0	FKBP4	Th
1.19192e-07	3.9372	0.175	0.131	0.00426994	0	SH2D1A	Th
1.20253e-05	6.64664	0.381	0.348	0.430796	0	FAM177A1	Th
0.00633603	4.92925	0.137	0.161	1	0	CTD-3252C9.4	Th
0	Inf	0.428	0.044	0	1	SPP1	TAM
0	Inf	0.942	0.764	0	1	CD74	TAM
0	Inf	0.997	0.969	0	1	FTH1	TAM
0	Inf	0.276	0.016	0	1	MMP12	TAM
0	Inf	0.518	0.07	0	1	APOE	TAM
0	Inf	0.996	0.946	0	1	FTL	TAM
0	Inf	0.894	0.141	0	1	CST3	TAM
0	Inf	0.387	0.024	0	1	MMP9	TAM
3.62916e-301	Inf	0.984	0.95	1.30011e-296	1	ACTB	TAM
1.50067e-294	Inf	0.233	0.017	5.37599e-290	1	CCL18	TAM
2.58103e-241	Inf	0.986	0.993	9.24627e-237	1	MT-CO1	TAM
0	1.38576	0.498	0.08	0	2	GZMK	Teff
1.27924e-27	1.19159	0.115	0.043	4.58275e-23	2	KLRG1	Teff
1.92063e-27	0.987461	0.232	0.123	6.88047e-23	2	LYAR	Teff
9.34516e-21	17.7212	0.527	0.624	3.34781e-16	2	SOD1	Teff
4.54685e-19	4.87837	0.089	0.192	1.62886e-14	2	SELL	Teff
1.67853e-12	8.54527	0.379	0.287	6.01317e-08	2	TUBA4A	Teff
4.04067e-10	0.845959	0.163	0.104	1.44753e-05	2	PYHIN1	Teff
7.08893e-07	9.87815	0.074	0.122	0.0253954	2	AQP3	Teff
3.97934e-06	7.53872	0.078	0.122	0.142556	2	FABP1	Teff
7.90358e-05	0.971956	0.139	0.185	1	2	INTS6	Teff
0	43.458	0.789	0.01	0	3	MS4A1	B
0	26.0236	0.642	0.114	0	3	CD79B	B
0	25.2642	0.558	0.083	0	3	SMIM14	B
3.54503e-55	17.1397	0.587	0.368	1.26997e-50	3	LIMD2	B
1.50378e-49	21.9549	0.169	0.404	5.38714e-45	3	ABRACL	B
5.22873e-22	26.1451	0.77	0.644	1.87314e-17	3	CORO1A	B
4.07342e-17	33.8004	0.518	0.391	1.45926e-12	3	RPL22L1	B
5.55159e-12	27.5785	0.66	0.576	1.9888e-07	3	HMGN1	B
1.13113e-09	16.8505	0.625	0.531	4.05217e-05	3	EIF3H	B
9.28899e-08	21.1182	0.285	0.365	0.00332769	3	PRDX6	B
0	317.685	0.55	0.1	0	4	GNLY	Tex
0	130.134	0.898	0.198	0	4	GZMA	Tex
0	49.3442	0.808	0.138	0	4	GZMB	Tex
0	46.4534	0.479	0.07	0	4	IFNG	Tex
0	43.573	0.965	0.189	0	4	NKG7	Tex
0	39.6941	0.979	0.278	0	4	CCL5	Tex
3.42867e-219	55.0169	0.238	0.023	1.22829e-214	4	XCL2	Tex
1.59481e-51	46.4588	0.939	0.825	5.71326e-47	4	UBB	Tex
3.33697e-06	24.8067	0.451	0.376	0.119543	4	DDIT4	Tex
0.000562409	28.5273	0.076	0.112	1	4	MYC	Tex
0	Inf	0.688	0.14	0	5	IGHA2	Plasma
0	Inf	0.544	0.047	0	5	IGHG2	Plasma
0	Inf	0.437	0.022	0	5	IGHGP	Plasma
0	888.87	0.325	0.006	0	5	IGLV6-57	Plasma
0	647.198	0.213	0.006	0	5	IGLL5	Plasma
0	387.441	1	0.626	0	5	SSR4	Plasma
0	358.364	0.997	0.083	0	5	MZB1	Plasma
0	305.28	0.983	0.411	0	5	HSP90B1	Plasma
2.32246e-164	Inf	0.248	0.029	8.31998e-160	5	IGLC7	Plasma
8.79017e-139	253.665	0.113	0.005	3.14899e-134	5	IGKV1-5	Plasma
0	83.173	0.781	0.149	0	6	TNFRSF4	Treg
0	13.9716	0.593	0.083	0	6	IL2RA	Treg
0	13.6413	0.601	0.077	0	6	AC133644.2	Treg
3.72377e-284	15.4143	0.983	0.565	1.334e-279	6	IL32	Treg
2.52833e-201	17.9443	0.153	0.005	9.05748e-197	6	CD177	Treg
1.50631e-196	16.9207	0.598	0.148	5.39619e-192	6	ICOS	Treg
2.70181e-192	13.8714	0.895	0.408	9.67896e-188	6	CD2	Treg
9.49253e-165	14.4839	0.947	0.472	3.4006e-160	6	CD3D	Treg
3.12193e-71	21.0378	0.923	0.649	1.1184e-66	6	RGS1	Treg
0.000760084	18.5305	0.169	0.124	1	6	GPR171	Treg
0	3.33555	0.832	0.092	0	7	SIK3	unknown
0	2.94772	0.707	0.008	0	7	BICDL1	unknown
0	2.7494	0.768	0.031	0	7	RACK1	unknown
0	2.7175	0.368	0.003	0	7	AL136456.1	unknown
9.90113e-284	2.85386	0.709	0.112	3.54698e-279	7	PDE3B	unknown
3.14429e-143	5.59618	0.547	0.111	1.12641e-138	7	SMARCA2	unknown
3.56222e-58	5.14756	0.741	0.358	1.27613e-53	7	PPP1CB	unknown
1.36695e-32	3.43634	0.453	0.194	4.89696e-28	7	VPS37B	unknown
1.17931e-30	8.83906	0.232	0.069	4.22474e-26	7	ICA1	unknown
0.000234561	6.15666	0.285	0.188	1	7	C12orf75	unknown
0	1.84128	0.42	0.017	0	8	TXNDC5	unknown
6.283e-294	6.98821	0.392	0.017	2.25082e-289	8	IGLC1	unknown
1.82274e-153	1.61463	0.314	0.024	6.52979e-149	8	TEX14	unknown
5.22952e-114	1.71986	0.345	0.039	1.87342e-109	8	CYTOR	unknown
8.91443e-92	1.67383	0.408	0.07	3.19351e-87	8	EIF2AK3	unknown
1.8554e-72	2.05549	0.412	0.08	6.64678e-68	8	TP53INP1	unknown
8.96212e-62	1.50183	0.4	0.089	3.21059e-57	8	HIPK2	unknown
8.94345e-58	1.6465	0.447	0.123	3.2039e-53	8	FNDC3A	unknown
2.85636e-41	1.86638	0.42	0.136	1.02326e-36	8	UBE2H	unknown
1.65593e-30	3.2869	0.31	0.089	5.93219e-26	8	TMEM156	unknown
0	4.86031	0.752	0.047	0	9	DOCK4	MDSC
0	4.75984	0.54	0.015	0	9	AZIN1-AS1	MDSC
0	4.00093	0.733	0.035	0	9	LUCAT1	MDSC
0	3.94182	0.822	0.069	0	9	AQP9	MDSC
6.67023e-302	4.32818	0.802	0.082	2.38954e-297	9	ARHGAP26	MDSC
3.89483e-245	4.29308	0.312	0.011	1.39528e-240	9	CCL3L1	MDSC
7.41609e-224	9.3499	0.351	0.016	2.65674e-219	9	HCAR2	MDSC
5.69178e-173	36.3164	0.332	0.02	2.03902e-168	9	HCAR3	MDSC
1.78189e-12	9.35239	0.188	0.069	6.38343e-08	9	NSMAF	MDSC
3.56681e-06	28.5409	0.198	0.408	0.127777	9	RHOH	MDSC
2.70173e-88	19.2236	0.646	0.086	9.67867e-84	10	DNAJB4	unknown
2.09662e-79	110.563	1	0.35	7.51094e-75	10	HSPA1B	unknown
8.1753e-73	93.2505	1	0.427	2.92872e-68	10	HSPA1A	unknown
5.20965e-64	19.6	0.948	0.359	1.8663e-59	10	CACYBP	unknown
1.37045e-35	18.2112	0.458	0.095	4.9095e-31	10	GADD45G	unknown
1.46062e-33	16.0508	0.698	0.25	5.23254e-29	10	MRPL18	unknown
4.05627e-08	88.8601	0.26	0.097	0.00145312	10	MAGEH1	unknown
4.98496e-08	14.36	0.156	0.043	0.00178581	10	TNFSF9	unknown
2.23597e-05	26.8866	0.656	0.54	0.801015	10	SAP18	unknown
0.000431055	15.0909	0.51	0.374	1	10	STK17A	unknown

## Sheet: TableS8
Table-S8:Marker genes for T cells state
Pro inflammatory	Anti-inflammatory
IL1A	TIGIT
IL1B	IDO1
TNF	LGALS3
IFNG	PDCD1
TBX21	FOXP3
CCL3	ENTPD1
CCL4	CD274
PRF1	CSF2
GZMA	CTLA4
GZMB	CXCL12
GZMK	CXCL5
GZMH	IL8
CD8A	MIF
FASLG	PTGS2
CCL2	VEGFA
CCL20
IL2
IL6
IL12a
IL17a
IL23a
PTGS2
TLR4
TNF
Pro_inflammatory	29961579
Anti_inflammatory	29961579
